# Supplementary material
Source: publisher site journal article supplement (https://www.spandidos-publications.com/1752/downloadSupplementary)
Supplement: Supplementary file 1 [file downloadSupplementary]

## Sheet: Sheet1
Table SII. DEGs between UECEs and normal tissues.
Gene	Mean(normal)	Mean(tumor)	LogFC	P Value	FDR
DES	9.47737	2.6863	-6.79107	1.03×10-59	6.92×10-58
MYH11	8.31751	1.95202	-6.36549	7.69×10-62	4.94×10-59
TAGLN	10.9199	4.69998	-6.21995	2.11×10-60	2.06×10-58
ACTG2	8.39473	2.56367	-5.83106	1.5×10-57	5.26×10-56
CNN1	8.47849	2.64804	-5.83045	2.68×10-60	2.42×10-58
EEF1G	5.97595	0.347345	-5.62861	7.37×10-40	3.51×10-39
ACTA2	10.6565	5.18405	-5.47242	1.11×10-60	1.33×10-58
DCN	8.13056	2.70721	-5.42334	1.91×10-61	5.49×10-59
C7	5.77282	0.436714	-5.3361	4.81×10-61	8.73×10-59
ADH1B	5.51141	0.223461	-5.28795	2.71×10-61	6.73×10-59
FHL1	6.97712	1.82809	-5.14903	2.29×10-62	4.94×10-59
FP236383.2	5.11277	0.0160479	-5.09672	4.28×10-26	1.04×10-25
TIMP3	5.52045	0.453599	-5.06685	5.56×10-55	1.15×10-53
AC004057.1	5.28314	0.219706	-5.06344	1.31×10-34	4.68×10-34
CCL14	5.15645	0.105237	-5.05121	3.39×10-60	2.8×10-58
FP236383.3	5.14032	0.0936757	-5.04664	1.06×10-27	2.75×10-27
FP671120.4	5.14143	0.0973953	-5.04403	8.55×10-27	2.14×10-26
MYLK	6.85725	1.85117	-5.00608	3.23×10-62	4.94×10-59
FXYD1	5.38232	0.407563	-4.97476	1.74×10-61	5.19×10-59
RNA5-8SN3	4.94095	0.001729	-4.93922	7.02×10-26	1.7×10-25
RNA5-8SN2	4.93951	0.0189723	-4.92054	2.27×10-24	5.18×10-24
LMOD1	6.78031	1.86873	-4.91158	1.79×10-61	5.24×10-59
RNA5-8SN1	4.93951	0.0488071	-4.8907	7.02×10-24	1.58×10-23
TNXB	5.31144	0.538709	-4.77273	1.13×10-61	4.94×10-59
RPL23AP42	6.54945	1.80397	-4.74548	2.25×10-44	1.45×10-43
PDLIM3	5.54499	0.802729	-4.74226	9.65×10-61	1.21×10-58
ADAM33	5.87084	1.15671	-4.71413	1.48×10-57	5.21×10-56
ACTA2-AS1	5.0928	0.415444	-4.67736	3.03×10-60	2.66×10-58
AC138969.1	4.75281	0.107662	-4.64515	2.32×10-31	7.04×10-31
ADIRF	4.60718	0.000664338	-4.60652	3.05×10-27	7.76×10-27
HSPB7	5.3726	0.798564	-4.57404	1.15×10-61	4.94×10-59
NPIPA9	4.61427	0.0411477	-4.57313	6.11×10-36	2.33×10-35
PGM5	5.78328	1.21749	-4.56579	1.54×10-61	5.14×10-59
FXYD6	6.44177	1.9175	-4.52428	2.19×10-58	9.36×10-57
ILK	5.98342	1.47389	-4.50954	1.63×10-55	3.66×10-54
RERG	5.4064	0.934778	-4.47162	1.67×10-62	4.94×10-59
MEG3	5.08935	0.662527	-4.42682	3.55×10-52	4.92×10-51
SPEG	5.1878	0.761193	-4.42661	1.92×10-58	8.42×10-57
APOD	6.77476	2.3999	-4.37486	2×10-53	3.28×10-52
PLN	5.24067	0.870584	-4.37009	9.27×10-60	6.38×10-58
TPM1	7.76223	3.44733	-4.31491	4.16×10-60	3.26×10-58
AC090498.1	7.64949	3.34342	-4.30607	8.36×10-43	4.8×10-42
GSTM2	5.49774	1.20639	-4.29135	4.97×10-54	8.91×10-53
HSPB6	7.05892	2.81925	-4.23967	5.6×10-60	4.13×10-58
CHRDL2	4.82307	0.590245	-4.23283	5.08×10-50	5.48×10-49
PTGIS	5.22452	0.998355	-4.22616	7.25×10-61	9.85×10-59
PTGER3	4.55978	0.346954	-4.21283	1.38×10-53	2.35×10-52
CHRDL1	5.01179	0.805914	-4.20588	1.37×10-59	8.78×10-58
DPT	5.03557	0.833103	-4.20247	2.57×10-59	1.49×10-57
PPP1R12B	5.53938	1.34837	-4.19101	3.33×10-61	7.18×10-59
DIO3OS	4.52948	0.35512	-4.17436	5.8×10-61	9.01×10-59
DST	5.87345	1.70811	-4.16534	4.12×10-51	5.04×10-50
PGM5-AS1	4.4949	0.338242	-4.15666	3.16×10-60	2.7×10-58
TOMM6	4.14658	0.000338463	-4.14624	5.99×10-25	1.4×10-24
EIF4A1	5.31132	1.17242	-4.1389	1.23×10-29	3.48×10-29
TGFB1I1	6.47939	2.36063	-4.11876	6.14×10-60	4.45×10-58
LIMS2	6.18612	2.11801	-4.06811	1.76×10-55	3.95×10-54
HAND2	5.06119	1.00284	-4.05835	3.95×10-61	7.83×10-59
CXCL12	6.00076	1.95523	-4.04554	6.15×10-58	2.36×10-56
KCNMA1	5.04674	1.01587	-4.03087	2.23×10-60	2.12×10-58
NPIPA1	4.68561	0.660476	-4.02514	5.91×10-41	3×10-40
SYNPO2	5.28821	1.26592	-4.02228	5.52×10-61	8.86×10-59
PRELP	5.67114	1.65107	-4.02007	4.58×10-60	3.53×10-58
MRGPRF	5.90914	1.89494	-4.0142	2.92×10-61	6.79×10-59
SPARCL1	8.55239	4.5599	-3.99248	2.81×10-60	2.5×10-58
OGN	4.55327	0.565007	-3.98826	1.33×10-59	8.62×10-58
RPL21P16	6.91604	2.94993	-3.96611	1.58×10-45	1.11×10-44
AL136131.3	3.94558	0.000338463	-3.94524	5.99×10-25	1.4×10-24
MASP1	4.30292	0.36192	-3.941	5.3×10-61	8.86×10-59
MAMDC2	4.42301	0.48216	-3.94085	7.97×10-62	4.94×10-59
RPL17	8.01841	4.09278	-3.92563	4.18×10-44	2.63×10-43
MGP	8.76947	4.87129	-3.89818	2.37×10-52	3.37×10-51
LTBP4	7.41002	3.53416	-3.87586	1.51×10-61	5.14×10-59
MEIS3	5.01572	1.18703	-3.82868	8.08×10-59	3.92×10-57
OSR2	6.32254	2.50104	-3.8215	7.12×10-61	9.83×10-59
SORBS1	5.0895	1.27324	-3.81626	2.1×10-60	2.06×10-58
WT1	5.05153	1.29957	-3.75197	1.74×10-54	3.35×10-53
MFAP4	6.93337	3.1827	-3.75067	1.61×10-55	3.63×10-54
MYO15B	5.84299	2.09994	-3.74305	5.01×10-50	5.42×10-49
PODN	5.23609	1.4974	-3.73869	3.84×10-60	3.05×10-58
NCAM1	4.55513	0.821881	-3.73325	2.06×10-57	7×10-56
MYL9	9.27177	5.54688	-3.72489	3.06×10-59	1.73×10-57
EIF3C	4.77588	1.05303	-3.72285	3.88×10-29	1.07×10-28
CACNA1H	4.85105	1.13522	-3.71583	5.33×10-61	8.86×10-59
TCF23	4.05341	0.343026	-3.71038	5.59×10-61	8.86×10-59
SMTN	6.58429	2.88261	-3.70168	1.5×10-55	3.41×10-54
CSRP1	8.31217	4.61774	-3.69442	2.26×10-62	4.94×10-59
CSDC2	4.76719	1.07514	-3.69205	2.98×10-58	1.23×10-56
RN7SL1	3.68873	0.000338463	-3.68839	5.99×10-25	1.4×10-24
C11orf96	6.39079	2.70469	-3.6861	1.23×10-58	5.69×10-57
HAND2-AS1	3.98517	0.308582	-3.67658	6.93×10-61	9.81×10-59
XIST	5.76596	2.09815	-3.66782	5.29×10-35	1.93×10-34
CCDC80	5.92926	2.27559	-3.65367	1.32×10-57	4.73×10-56
AC132217.1	3.6514	0.000338463	-3.65106	5.99×10-25	1.4×10-24
GAS1	5.32334	1.67583	-3.6475	3.19×10-57	1.04×10-55
TNFAIP8L3	4.64056	0.993371	-3.64718	3.39×10-60	2.8×10-58
FLNA	9.87589	6.24876	-3.62713	4.24×10-57	1.35×10-55
RAMP1	7.72856	4.11344	-3.61512	6.74×10-58	2.57×10-56
ARL6IP4	4.842	1.2357	-3.6063	1.42×10-22	3.02×10-22
ST5	5.97454	2.3753	-3.59924	9.46×10-62	4.94×10-59
PRUNE2	4.26168	0.684269	-3.57741	3.98×10-60	3.13×10-58
TNS1	6.13201	2.56203	-3.56998	8.25×10-61	1.1×10-58
TPM2	8.70326	5.14407	-3.55919	4.86×10-58	1.9×10-56
RGS2	6.40398	2.84856	-3.55543	2.29×10-57	7.7×10-56
TMEM200B	4.56383	1.01112	-3.55271	3.35×10-58	1.37×10-56
RSPO1	4.11424	0.575067	-3.53918	9.56×10-61	1.2×10-58
NEAT1	7.15374	3.62014	-3.53359	1.47×10-35	5.49×10-35
ANTXR2	5.21823	1.70403	-3.5142	1.53×10-58	6.87×10-57
RASA4	3.57663	0.0712181	-3.50541	1.24×10-55	2.86×10-54
ARHGEF25	5.46553	1.96372	-3.50181	2.76×10-61	6.73×10-59
CALD1	7.17798	3.68899	-3.48899	9.4×10-60	6.44×10-58
TNS2	6.27396	2.79167	-3.48229	5.01×10-62	4.94×10-59
GABBR1	4.95402	1.49625	-3.45778	2.48×10-54	4.66×10-53
FBXO32	5.6518	2.19493	-3.45687	1.14×10-59	7.61×10-58
JPH2	4.05034	0.602603	-3.44774	3.95×10-59	2.12×10-57
SYTL4	4.66267	1.2285	-3.43417	6.35×10-59	3.18×10-57
AP000892.3	3.89143	0.469542	-3.42189	6.51×10-57	1.99×10-55
SOCS2	4.61177	1.19	-3.42177	1.04×10-55	2.42×10-54
AOC3	4.83579	1.42818	-3.40761	2.89×10-58	1.2×10-56
XBP1	3.40393	0.000338463	-3.40359	5.99×10-25	1.4×10-24
CARMN	3.51675	0.115567	-3.40119	4.67×10-60	3.58×10-58
CBX7	4.88172	1.48643	-3.39529	1.6×10-62	4.94×10-59
SYNE1	3.95706	0.562802	-3.39426	6.25×10-62	4.94×10-59
PDE2A	3.88138	0.506318	-3.37506	5.5×10-61	8.86×10-59
DBNDD2	4.27816	0.905632	-3.37253	1.31×10-52	1.93×10-51
FLNC	4.6298	1.25905	-3.37076	6.4×10-57	1.97×10-55
FGF7	3.72259	0.355209	-3.36738	3.1×10-61	6.89×10-59
SELENOP	5.58406	2.21932	-3.36474	1.64×10-56	4.54×10-55
IGFBP6	6.42396	3.06721	-3.35674	3.69×10-56	9.31×10-55
RNASE4	3.7738	0.419379	-3.35443	5.55×10-54	9.86×10-53
ZCCHC12	4.53248	1.18077	-3.35171	2.49×10-47	2.06×10-46
NDRG2	6.63883	3.29039	-3.34844	2.59×10-55	5.66×10-54
RPL39	7.97488	4.63764	-3.33724	7.67×10-40	3.65×10-39
NPIPB5	4.37271	1.0367	-3.33601	3.3×10-20	6.47×10-20
NEXN	4.23734	0.914407	-3.32293	2.78×10-58	1.17×10-56
POLR2F	3.38468	0.0632759	-3.3214	3.87×10-48	3.45×10-47
SH3BP5	4.57114	1.25435	-3.31679	1.01×10-59	6.83×10-58
ANGPTL1	4.15049	0.837956	-3.31253	3.25×10-54	5.98×10-53
LGI4	3.80648	0.494262	-3.31222	6.57×10-61	9.74×10-59
CMAHP	4.2013	0.903454	-3.29784	3.16×10-60	2.7×10-58
SNORD3A	3.34695	0.0581372	-3.28881	7.52×10-26	1.82×10-25
LCN6	3.38972	0.103479	-3.28624	4.77×10-59	2.48×10-57
U2AF1	3.38522	0.0999408	-3.28528	1.69×10-34	6.01×10-34
GAS6	6.72164	3.43815	-3.28349	2.7×10-61	6.73×10-59
MSRB3	4.74917	1.46796	-3.28121	6.84×10-59	3.38×10-57
CLEC3B	4.61255	1.33645	-3.27609	4.61×10-56	1.14×10-54
TACC1	5.22556	1.95152	-3.27404	4.86×10-62	4.94×10-59
C9orf3	5.10519	1.83173	-3.27346	1.54×10-59	9.64×10-58
RNASEK	5.31921	2.05682	-3.26239	1.02×10-20	2.04×10-20
EFEMP1	5.34744	2.09746	-3.24998	2.36×10-56	6.22×10-55
GTF2IP1	3.36694	0.12321	-3.24373	4.11×10-40	1.99×10-39
TSPAN2	4.18304	0.941634	-3.24141	4×10-59	2.14×10-57
ALDH1A2	4.4419	1.20371	-3.2382	8.3×10-60	5.78×10-58
KANK2	6.95743	3.73953	-3.21789	3.4×10-60	2.8×10-58
RPS29	8.21153	4.99581	-3.21572	1.49×10-40	7.41×10-40
NPIPB12	3.33628	0.131608	-3.20468	2.99×10-26	7.35×10-26
RBPMS	6.28355	3.09078	-3.19278	2.11×10-58	9.08×10-57
MXRA7	5.98753	2.7996	-3.18793	1.81×10-59	1.09×10-57
CAV1	6.2678	3.09091	-3.17688	3.53×10-59	1.94×10-57
COL16A1	5.19492	2.0202	-3.17471	2.53×10-52	3.59×10-51
CDH13	3.92693	0.756777	-3.17016	4.83×10-53	7.56×10-52
PKD1	5.4549	2.28605	-3.16885	2.36×10-57	7.88×10-56
MAGI2-AS3	3.56696	0.399235	-3.16772	4.99×10-62	4.94×10-59
CRYAB	6.28459	3.1172	-3.16739	1.69×10-48	1.55×10-47
POLR2J3	3.70664	0.546265	-3.16037	1.03×10-21	2.13×10-21
KCNMB1	3.97393	0.814284	-3.15965	1.43×10-56	4.01×10-55
DACT3	4.01315	0.854505	-3.15864	2.1×10-60	2.06×10-58
MACF1	5.43022	2.28657	-3.14365	7.81×10-57	2.35×10-55
GSTM5	3.4783	0.340405	-3.1379	5.87×10-62	4.94×10-59
DPP6	3.6021	0.464362	-3.13774	1.54×10-53	2.6×10-52
SRPX	4.44454	1.31047	-3.13407	9.42×10-56	2.22×10-54
ITGA7	4.69846	1.56797	-3.13048	9.31×10-53	1.4×10-51
PRRT2	3.74674	0.623997	-3.12274	1.14×10-56	3.29×10-55
SELENOM	7.18421	4.06453	-3.11968	4.3×10-56	1.07×10-54
RIPOR3	3.85777	0.761831	-3.09594	2.42×10-59	1.42×10-57
AL162151.2	5.91759	2.82359	-3.09401	3.28×10-27	8.35×10-27
ADAMTSL4	4.01693	0.933658	-3.08327	5.86×10-59	2.98×10-57
MAOB	5.89557	2.81295	-3.08262	2.2×10-56	5.9×10-55
EEF1D	6.80712	3.74057	-3.06654	8.63×10-48	7.42×10-47
CES1	4.43496	1.3689	-3.06606	7.05×10-45	4.72×10-44
SERPINF1	7.30305	4.2541	-3.04894	3.4×10-57	1.1×10-55
ADCY4	4.24282	1.19459	-3.04823	1.63×10-48	1.5×10-47
AC129492.1	5.36814	2.32519	-3.04295	1.24×10-56	3.52×10-55
TCEAL2	4.19502	1.15616	-3.03886	1.72×10-48	1.58×10-47
MAN2C1	5.71099	2.67285	-3.03814	7.47×10-46	5.37×10-45
MRVI1	4.53091	1.5032	-3.02771	3.61×10-59	1.98×10-57
ABI3BP	3.78854	0.761441	-3.0271	4.15×10-61	8.13×10-59
CFL2	4.94922	1.92892	-3.02029	1.8×10-60	1.88×10-58
SPSB3	3.62357	0.603915	-3.01966	1.57×10-39	7.32×10-39
LCN10	3.06096	0.0522567	-3.00871	4.25×10-59	2.27×10-57
NPIPB3	3.59341	0.590065	-3.00335	1.55×10-24	3.56×10-24
MEIS2	4.25374	1.25332	-3.00042	7.83×10-55	1.58×10-53
PSD	4.50057	1.50245	-2.99812	3.49×10-54	6.38×10-53
LDB2	4.62566	1.63048	-2.99518	7.07×10-58	2.68×10-56
FRMD6-AS2	3.07326	0.0836237	-2.98963	6.48×10-62	4.94×10-59
ACKR1	5.35474	2.37222	-2.98252	3.13×10-45	2.16×10-44
PHLDB1	4.95099	1.96957	-2.98141	1.2×10-45	8.51×10-45
LAMA4	4.99506	2.01751	-2.97755	1.67×10-57	5.82×10-56
PCDHGC3	4.42893	1.45172	-2.97721	2.29×10-52	3.27×10-51
ECHDC2	5.52457	2.54752	-2.97705	6.03×10-40	2.89×10-39
RSPO3	4.12197	1.14509	-2.97688	4.13×10-47	3.32×10-46
COL4A6	3.34987	0.37545	-2.97442	1.8×10-60	1.88×10-58
FRMD6	4.30234	1.33084	-2.9715	7.54×10-54	1.32×10-52
AC126755.1	3.2488	0.304137	-2.94467	7.82×10-47	6.15×10-46
EMILIN1	6.41881	3.48275	-2.93606	1.19×10-56	3.4×10-55
MFAP5	4.59535	1.66095	-2.9344	3.24×10-34	1.13×10-33
ZBTB16	3.03022	0.100307	-2.92992	7.12×10-61	9.83×10-59
ITPR1	3.92639	0.997356	-2.92903	1.25×10-58	5.74×10-57
SGCA	3.40755	0.481216	-2.92633	1.06×10-53	1.82×10-52
GABARAP	6.86763	3.94291	-2.92472	5.84×10-45	3.94×10-44
JPH4	3.34622	0.421752	-2.92447	2.16×10-60	2.08×10-58
NPIPB4	3.25584	0.338957	-2.91689	3.58×10-30	1.03×10-29
CACNA1C	3.43451	0.520213	-2.9143	1.22×10-52	1.81×10-51
MUC20-OT1	3.97959	1.07158	-2.90801	1.94×10-36	7.62×10-36
RPL36A	7.35279	4.45058	-2.9022	1.29×10-36	5.12×10-36
PPP1R14A	5.70838	2.80626	-2.90213	5.27×10-46	3.84×10-45
PMP22	5.9897	3.08873	-2.90097	9.98×10-57	2.93×10-55
COL6A3	6.05296	3.15674	-2.89622	2.9×10-51	3.62×10-50
C1S	6.94492	4.05804	-2.88688	3.85×10-56	9.7×10-55
CRISPLD2	4.70424	1.8181	-2.88614	8.55×10-51	1.01×10-49
RERGL	3.20024	0.315669	-2.88457	5.38×10-60	4×10-58
NFATC4	5.51064	2.62781	-2.88283	2.12×10-53	3.46×10-52
PBX1	5.46544	2.58453	-2.88091	5.08×10-60	3.82×10-58
ANKHD1	3.39066	0.515159	-2.8755	2.06×10-24	4.71×10-24
U2AF1L5	2.93488	0.0593997	-2.87548	1.2×10-25	2.88×10-25
RIPOR2	3.58012	0.712529	-2.86759	8.16×10-60	5.7×10-58
MUSTN1	2.91408	0.0483275	-2.86576	2.25×10-44	1.45×10-43
KLC1	4.75986	1.89804	-2.86182	1.73×10-32	5.55×10-32
SHISAL1	3.43086	0.573068	-2.85779	2.05×10-56	5.51×10-55
TSPYL2	5.83119	2.97592	-2.85528	4.15×10-58	1.65×10-56
GPRASP1	3.57109	0.720328	-2.85076	2.38×10-62	4.94×10-59
BNC2	3.32763	0.477054	-2.85058	1.55×10-61	5.14×10-59
SARNP	3.62607	0.777035	-2.84904	2.04×10-35	7.59×10-35
PDLIM2	3.96606	1.12202	-2.84405	2.38×10-44	1.52×10-43
PLSCR3	3.21872	0.381813	-2.83691	7.84×10-32	2.43×10-31
SMOC2	6.009	3.17707	-2.83193	5.81×10-54	1.03×10-52
RAP1B	4.28739	1.46102	-2.82637	3.32×10-44	2.1×10-43
CAVIN2	4.21229	1.38637	-2.82592	4.32×10-56	1.07×10-54
TTLL3	4.27768	1.45486	-2.82283	8.6×10-42	4.63×10-41
LMCD1	4.44883	1.62752	-2.82131	2.02×10-58	8.78×10-57
APBB1	4.93797	2.12144	-2.81653	1.06×10-61	4.94×10-59
LEFTY2	4.23868	1.43157	-2.80711	3.52×10-36	1.36×10-35
EVA1C	4.45899	1.68143	-2.77756	2.55×10-58	1.08×10-56
TCEAL1	5.9529	3.17565	-2.77725	1.98×10-62	4.94×10-59
C4A	3.84974	1.07453	-2.77521	6.8×10-39	3.07×10-38
PDLIM7	7.21149	4.43672	-2.77477	3.01×10-51	3.74×10-50
FBXL22	3.42308	0.654724	-2.76835	1.81×10-59	1.09×10-57
TCEAL7	3.97059	1.20344	-2.76715	2.67×10-56	6.95×10-55
BCHE	3.08456	0.320519	-2.76404	2.09×10-58	9.03×10-57
PALLD	6.7448	3.98092	-2.76388	1.19×10-52	1.77×10-51
CHRD	4.1641	1.40096	-2.76314	1.6×10-47	1.35×10-46
ITGA11	3.87489	1.11848	-2.75641	1.75×10-45	1.23×10-44
FAP	3.59373	0.841855	-2.75187	2.98×10-45	2.06×10-44
JAM3	4.44003	1.69164	-2.74838	3.76×10-58	1.51×10-56
SNCA	3.45852	0.712585	-2.74594	1.36×10-56	3.82×10-55
RASL12	4.61411	1.87454	-2.73957	1.24×10-58	5.73×10-57
ITM2A	4.52292	1.78519	-2.73774	1.18×10-54	2.32×10-53
BOC	4.52919	1.79174	-2.73744	5.49×10-52	7.48×10-51
PPP1R12C	6.14847	3.413	-2.73547	5.87×10-57	1.82×10-55
JAM2	3.95392	1.22904	-2.72488	3.25×10-57	1.05×10-55
RASGRP2	3.45854	0.742488	-2.71605	6.45×10-55	1.32×10-53
SVIL	5.45836	2.74293	-2.71542	4.69×10-58	1.84×10-56
PDGFRA	4.24702	1.53331	-2.71371	8.7×10-54	1.51×10-52
ACAD11	2.82021	0.107207	-2.713	1.97×10-42	1.11×10-41
STAG3L5P-PVRIG2P-PILRB	3.73188	1.02096	-2.71092	2.19×10-23	4.83×10-23
IGFBP5	8.01916	5.31337	-2.70579	1.53×10-44	9.98×10-44
PLSCR4	3.78685	1.08175	-2.7051	7.22×10-62	4.94×10-59
GYPC	4.74493	2.04157	-2.70336	1.75×10-60	1.87×10-58
NBL1	6.29659	3.59983	-2.69676	2.71×10-57	8.98×10-56
FBLN5	6.02474	3.33238	-2.69236	3.33×10-52	4.64×10-51
GSN	7.86785	5.1756	-2.69225	1.76×10-60	1.88×10-58
MXRA8	6.50302	3.81343	-2.6896	1.47×10-50	1.69×10-49
MATN2	5.64012	2.95399	-2.68613	3.4×10-50	3.74×10-49
ATOH8	3.66765	0.981625	-2.68603	1.02×10-55	2.38×10-54
GPS2	4.04479	1.36168	-2.68312	2.24×10-29	6.28×10-29
CALHM2	5.05837	2.37979	-2.67858	2.11×10-60	2.06×10-58
TBC1D1	6.07717	3.39999	-2.67718	4.04×10-56	1.01×10-54
DDX47	3.13715	0.46311	-2.67404	4.7×10-33	1.55×10-32
AC092683.1	2.79866	0.130503	-2.66815	8.96×10-29	2.44×10-28
CCN5	3.07451	0.412218	-2.66229	3.9×10-56	9.8×10-55
SPON2	5.80244	3.14044	-2.662	7.52×10-45	5.03×10-44
PSMC1P5	2.76018	0.107389	-2.65279	1.48×10-27	3.81×10-27
RPL22P1	4.97163	2.32001	-2.65162	3.09×10-40	1.51×10-39
TRAPPC5	3.07065	0.41969	-2.65096	1.9×10-33	6.38×10-33
MIR4697HG	2.85124	0.20174	-2.6495	9.21×10-62	4.94×10-59
NR4A1	5.48293	2.83537	-2.64755	2.22×10-42	1.24×10-41
AL732372.2	2.76151	0.114135	-2.64738	4.81×10-29	1.33×10-28
RPS23	9.44665	6.79978	-2.64686	6.89×10-56	1.65×10-54
IFFO1	3.80236	1.15565	-2.64671	5.17×10-56	1.26×10-54
SLC24A3	4.04115	1.39883	-2.64232	1.2×10-58	5.59×10-57
CLDN5	5.05934	2.41847	-2.64087	2.59×10-47	2.13×10-46
NLRP1	3.9236	1.28371	-2.63989	1.96×10-58	8.58×10-57
WT1-AS	3.07523	0.435684	-2.63955	4.33×10-59	2.28×10-57
CALCOCO1	5.48495	2.84582	-2.63914	1.1×10-60	1.33×10-58
TSPAN18	3.97884	1.34021	-2.63864	3.79×10-55	8.04×10-54
PLEKHH2	3.43009	0.791798	-2.63829	8.87×10-56	2.11×10-54
SERF1B	2.81433	0.176233	-2.6381	6.31×10-39	2.85×10-38
CLMP	3.80947	1.1731	-2.63637	1.1×10-57	3.95×10-56
C17orf49	3.37973	0.747134	-2.6326	2.48×10-40	1.21×10-39
NDN	5.06402	2.4352	-2.62882	2.25×10-56	6×10-55
C16orf45	4.36558	1.73989	-2.62569	1.92×10-59	1.15×10-57
FERMT2	4.99717	2.37226	-2.62491	2.77×10-55	6.02×10-54
CNRIP1	3.82477	1.20236	-2.62241	6.71×10-60	4.81×10-58
RGMA	3.94342	1.33249	-2.61093	1.94×10-55	4.33×10-54
CHKB	3.93191	1.32267	-2.60924	2.82×10-28	7.5×10-28
RARRES2	7.20482	4.59704	-2.60778	7.73×10-54	1.35×10-52
OLFM1	3.3165	0.712302	-2.6042	1.74×10-54	3.35×10-53
TGFBR3	4.04224	1.44497	-2.59728	7.8×10-59	3.79×10-57
AHNAK2	4.05787	1.46277	-2.5951	1.65×10-44	1.07×10-43
ZEB1	3.9298	1.33573	-2.59407	2.03×10-56	5.48×10-55
PID1	3.19898	0.606167	-2.59281	2.94×10-59	1.67×10-57
UBE2V1	3.6594	1.06799	-2.59142	1.88×10-27	4.83×10-27
PLXDC1	3.70725	1.11656	-2.59069	2.12×10-51	2.69×10-50
LIFR	3.91969	1.32979	-2.5899	3.67×10-60	2.96×10-58
HERC2P9	3.52217	0.932376	-2.58979	1.3×10-36	5.15×10-36
EIF3CL	2.71256	0.123255	-2.5893	3.46×10-34	1.21×10-33
C4B	3.86296	1.27857	-2.58439	8.02×10-36	3.05×10-35
AQP1	6.34312	3.75921	-2.58391	1.41×10-50	1.62×10-49
XAF1	3.64856	1.06626	-2.5823	4.16×10-40	2.01×10-39
HERC2P3	2.95637	0.375191	-2.58118	2.69×10-35	9.94×10-35
LRP1	5.93988	3.35929	-2.58059	1.08×10-56	3.13×10-55
RPRM	3.51373	0.934194	-2.57953	1.11×10-49	1.16×10-48
SKP1	6.5587	3.98286	-2.57584	1.19×10-52	1.76×10-51
RIC3	2.73794	0.164277	-2.57367	2.22×10-61	6.09×10-59
MMP23B	2.65877	0.0889778	-2.5698	2.65×10-39	1.22×10-38
MIR99AHG	3.20723	0.639063	-2.56816	3.47×10-59	1.93×10-57
TPSB2	3.79118	1.22571	-2.56547	2.3×10-42	1.28×10-41
ENPP2	5.10329	2.53955	-2.56373	2.35×10-46	1.78×10-45
PKD1P6	3.28084	0.718291	-2.56255	1.39×10-44	9.07×10-44
COL14A1	4.62098	2.06196	-2.55903	2.04×10-46	1.55×10-45
UPK3BL1	3.03011	0.473398	-2.55671	6.74×10-30	1.93×10-29
PDK4	4.6538	2.10844	-2.54537	6.65×10-48	5.79×10-47
RPS15A	8.25883	5.71488	-2.54396	6.29×10-48	5.49×10-47
AKT3	3.50469	0.962705	-2.54199	1.27×10-61	4.94×10-59
AC022149.1	3.33869	0.79724	-2.54145	1.36×10-38	6.02×10-38
DDX39B	6.26207	3.72278	-2.53929	1.11×10-29	3.16×10-29
HIF3A	3.31091	0.775411	-2.5355	7.32×10-42	3.97×10-41
DMPK	5.4874	2.9527	-2.53471	1.34×10-52	1.97×10-51
MPRIP	5.567	3.03653	-2.53046	4.73×10-58	1.85×10-56
CYBRD1	5.56896	3.04629	-2.52267	2.05×10-57	6.98×10-56
BBS1	2.98177	0.467579	-2.51419	2.97×10-41	1.54×10-40
ADAMTS10	3.64616	1.13373	-2.51243	2.41×10-52	3.44×10-51
TIMP2	7.37823	4.86947	-2.50875	2.8×10-55	6.09×10-54
IL11RA	4.04162	1.53564	-2.50598	1.57×10-54	3.04×10-53
PCP4	4.26591	1.76533	-2.50058	4.95×10-33	1.63×10-32
MIR100HG	4.13917	1.63936	-2.49981	3.25×10-55	7×10-54
MAPK10	3.31378	0.81565	-2.49813	8.33×10-57	2.5×10-55
NOSTRIN	3.59331	1.09731	-2.49599	2.29×10-56	6.06×10-55
SLC25A27	4.11265	1.61888	-2.49377	5.31×10-49	5.16×10-48
GATA6	3.40401	0.91489	-2.48912	3.87×10-56	9.73×10-55
HOXD4	2.95279	0.464622	-2.48816	8.61×10-56	2.05×10-54
HMGB1P6	5.01663	2.53174	-2.48489	9.37×10-32	2.9×10-31
ABCA8	2.80801	0.325086	-2.48293	2.98×10-61	6.79×10-59
PSMC1	4.21376	1.73119	-2.48257	2.84×10-29	7.9×10-29
TPSAB1	3.80359	1.32288	-2.48071	9.95×10-41	4.99×10-40
TPT1-AS1	3.62476	1.14957	-2.4752	2.2×10-48	2.01×10-47
SLMAP	4.51569	2.04105	-2.47464	1.72×10-56	4.72×10-55
FKBP5	3.98001	1.50646	-2.47355	3.69×10-35	1.36×10-34
TSPOAP1	4.18388	1.71068	-2.4732	8.41×10-51	9.96×10-50
ASPN	4.08734	1.61982	-2.46752	2.5×10-37	1.03×10-36
H19	6.09824	3.63171	-2.46653	2.25×10-29	6.3×10-29
H3F3A	5.8621	3.39849	-2.46361	2.37×10-27	6.07×10-27
RPSAP58	3.40102	0.940058	-2.46096	1.46e-17	2.63e-17
STON1	3.38137	0.922988	-2.45839	2.94×10-59	1.67×10-57
SDR39U1	4.36018	1.90503	-2.45514	1.59×10-30	4.67×10-30
LRRN4CL	3.74624	1.29142	-2.45482	1.03×10-57	3.73×10-56
FILIP1L	4.59637	2.14576	-2.4506	3.69×10-46	2.72×10-45
MIR503HG	3.17287	0.725255	-2.44761	8.87×10-56	2.11×10-54
AMY2B	3.13178	0.684233	-2.44754	6.18×10-49	5.95×10-48
ZCCHC24	4.35133	1.90768	-2.44365	6.54×10-59	3.25×10-57
AC139256.2	3.08802	0.645702	-2.44232	1.06×10-41	5.65×10-41
CLIP3	4.97606	2.53626	-2.4398	9.09×10-55	1.81×10-53
SLC22A3	2.83489	0.397889	-2.437	7.32×10-58	2.76×10-56
GTF2IRD2B	3.23828	0.805279	-2.433	5.17×10-55	1.08×10-53
CD27-AS1	4.8325	2.40079	-2.43171	3.11×10-55	6.7×10-54
ADGRA2	4.32631	1.89621	-2.43009	8.24×10-55	1.65×10-53
PLAC9	3.44283	1.01451	-2.42832	1.81×10-56	4.93×10-55
SLC26A10	2.56645	0.140637	-2.42582	4.54×10-49	4.44×10-48
MICAL3	3.30341	0.877949	-2.42547	5×10-52	6.82×10-51
NOMO2	3.44335	1.01834	-2.42501	8.52×10-28	2.22×10-27
NFASC	2.89667	0.471923	-2.42475	2.06×10-58	8.93×10-57
EGFL8	3.20429	0.780543	-2.42374	5.99×10-44	3.73×10-43
AASS	3.25901	0.835361	-2.42365	3.35×10-59	1.88×10-57
AARSD1	3.51813	1.0963	-2.42183	2.22×10-32	7.08×10-32
AKAP13	4.88533	2.46479	-2.42054	5.8×10-53	8.98×10-52
GOLGA8A	4.72679	2.30886	-2.41793	2.48×10-32	7.88×10-32
TGM2	6.72279	4.30517	-2.41762	5.57×10-50	5.99×10-49
TSC22D3	6.05711	3.64153	-2.41557	1.25×10-47	1.06×10-46
GARS-DT	3.27427	0.862272	-2.412	3.18×10-28	8.44×10-28
PNISR	5.57026	3.16029	-2.40996	1.26×10-45	8.91×10-45
COX7A1	4.71919	2.31012	-2.40907	2.02×10-55	4.48×10-54
TXNDC5	3.53882	1.13409	-2.40472	2.04×10-28	5.46×10-28
CD34	4.85251	2.44924	-2.40327	8.83×10-51	1.04×10-49
MATR3	2.81604	0.415724	-2.40032	9.48×10-38	4×10-37
MIR497HG	2.70748	0.307274	-2.4002	4.67×10-56	1.15×10-54
FBXO17	3.65187	1.25249	-2.39937	1.04×10-50	1.22×10-49
MRPL38	4.10745	1.70808	-2.39937	1.18×10-23	2.63×10-23
ADCY3	4.53448	2.13621	-2.39826	2.69×10-53	4.36×10-52
PDE8B	3.32336	0.926219	-2.39714	3.24×10-60	2.73×10-58
HMGB1P5	4.17772	1.78376	-2.39396	7.51×10-30	2.14×10-29
RPL37A	9.66042	7.26772	-2.3927	2.9×10-38	1.26×10-37
HSPB8	4.98997	2.59994	-2.39003	5.27×10-44	3.29×10-43
HOXD10	4.28669	1.89784	-2.38885	9.37×10-37	3.74×10-36
ANKRD29	2.98237	0.595508	-2.38686	1.31×10-60	1.53×10-58
CAVIN1	7.28259	4.8981	-2.38449	6.51×10-57	1.99×10-55
TUBB6	5.68271	3.29932	-2.38339	4.73×10-53	7.41×10-52
PCSK7	3.45169	1.07089	-2.3808	1.24×10-40	6.18×10-40
TCEAL3	5.83868	3.4601	-2.37858	4.17×10-60	3.26×10-58
AC004890.2	2.94891	0.570806	-2.3781	6.55×10-45	4.41×10-44
ZNF410	2.74061	0.367447	-2.37316	5.75×10-40	2.76×10-39
LONRF2	3.47506	1.10621	-2.36884	1.63×10-60	1.79×10-58
SYNM	3.11751	0.748783	-2.36873	2.09×10-57	7.06×10-56
ASB2	3.42519	1.06312	-2.36207	4.42×10-54	7.98×10-53
KLF2	4.97724	2.62102	-2.35623	1.03×10-49	1.08×10-48
TUB	3.24713	0.892021	-2.35511	3.11×10-60	2.7×10-58
RAB23	3.73543	1.3813	-2.35413	7.22×10-53	1.1×10-51
PLIN4	3.36605	1.01391	-2.35214	6.32×10-54	1.12×10-52
SFRP4	5.66456	3.31347	-2.35109	3.14×10-19	5.94×10-19
MYOCD	2.55323	0.204194	-2.34904	6.87×10-61	9.81×10-59
CAV2	3.93817	1.59419	-2.34398	1.09×10-55	2.53×10-54
ACOX2	3.54451	1.20178	-2.34273	5.77×10-57	1.79×10-55
TCEAL4	7.5101	5.16887	-2.34123	2.45×10-60	2.28×10-58
RBM4	4.28	1.94267	-2.33733	3.01×10-28	7.98×10-28
RAPGEF3	4.1178	1.78049	-2.33731	5.8×10-42	3.16×10-41
TMOD1	4.35516	2.01976	-2.3354	9.1×10-46	6.5×10-45
GOLGA8B	4.21395	1.88093	-2.33301	1.14×10-35	4.29×10-35
NR2F2	5.78658	3.45421	-2.33238	4.33×10-59	2.28×10-57
ADGRD1	2.57267	0.241714	-2.33096	7.53×10-60	5.33×10-58
FAXDC2	3.77165	1.44455	-2.32711	4.37×10-59	2.3×10-57
PILRB	3.39693	1.06985	-2.32708	9.96×10-21	1.99×10-20
GOLGA6L5P	2.50934	0.183245	-2.3261	5.53×10-42	3.02×10-41
AP001107.5	2.57322	0.248547	-2.32467	1.26×10-59	8.23×10-58
GIMAP5	2.4471	0.124734	-2.32237	1.07×10-53	1.84×10-52
GARNL3	2.88877	0.567528	-2.32124	1.71×10-61	5.19×10-59
PHLDB2	3.23067	0.910894	-2.31978	3.35×10-50	3.69×10-49
DPYSL3	5.57291	3.25336	-2.31955	1.9×10-43	1.14×10-42
PCBP1-AS1	3.23488	0.915946	-2.31893	3.96×10-37	1.62×10-36
C1orf21	3.97403	1.65576	-2.31827	1.54×10-54	2.99×10-53
KCNAB3	3.04725	0.736012	-2.31124	1.09×10-46	8.51×10-46
GUSBP11	2.54814	0.24076	-2.30738	6.74×10-32	2.1×10-31
IRF9	3.80968	1.50306	-2.30662	2.73×10-20	5.37×10-20
CDK11A	3.73478	1.42829	-2.30649	1.49×10-24	3.42×10-24
OLFML3	5.94834	3.64381	-2.30452	1.89×10-47	1.58×10-46
KRTCAP2	5.45721	3.15906	-2.29816	3.78×10-19	7.14×10-19
TSHZ3	3.3349	1.0378	-2.2971	2.44×10-59	1.42×10-57
HMCN2	2.58557	0.289377	-2.2962	1.4×10-48	1.3×10-47
CLK1	5.98119	3.68678	-2.29442	1.41×10-50	1.62×10-49
ACTN1	6.76751	4.4744	-2.29311	6.35×10-56	1.53×10-54
PEG3	2.67625	0.384958	-2.29129	1.72×10-58	7.64×10-57
SSC5D	3.65243	1.36299	-2.28944	1.33×10-50	1.53×10-49
NPR2	4.09712	1.8105	-2.28662	3.67×10-60	2.96×10-58
AEBP1	7.14368	4.85805	-2.28562	9.91×10-48	8.48×10-47
HSPA1A	6.29939	4.01723	-2.28216	6.36×10-38	2.71×10-37
NXPH3	2.85417	0.578157	-2.27601	4.23×10-58	1.67×10-56
JCAD	3.56913	1.2949	-2.27423	1.78×10-59	1.08×10-57
CAVIN3	5.32558	3.05443	-2.27115	4.26×10-49	4.18×10-48
EMCN	3.23485	0.96405	-2.2708	4.12×10-56	1.03×10-54
LAT	2.45113	0.183581	-2.26755	4.19×10-24	9.49×10-24
CBWD5	2.62909	0.362829	-2.26626	1.67×10-23	3.7×10-23
AP002956.1	5.66766	3.40335	-2.26431	2.93×10-47	2.39×10-46
CMYA5	2.70558	0.441429	-2.26415	1.76×10-54	3.37×10-53
RPL26	8.938	6.67404	-2.26395	7.2×10-48	6.24×10-47
MAP3K12	3.80102	1.53874	-2.26229	9.56×10-55	1.9×10-53
ARHGAP6	2.6181	0.359016	-2.25909	3.13×10-60	2.7×10-58
KSR1	3.69576	1.43672	-2.25904	1.59×10-51	2.05×10-50
SULF2	6.20323	3.94419	-2.25904	5.07×10-51	6.13×10-50
ADHFE1	2.96056	0.703033	-2.25753	2.36×10-56	6.22×10-55
C2orf40	3.50571	1.24875	-2.25696	1.59×10-39	7.42×10-39
RBFOX3	2.45593	0.200072	-2.25585	2.53×10-49	2.54×10-48
HYI	4.34633	2.09236	-2.25396	1.86×10-43	1.12×10-42
SSBP2	3.64239	1.39117	-2.25121	5.45×10-60	4.04×10-58
C2orf74	2.73543	0.485462	-2.24997	2.35×10-57	7.86×10-56
CYP1B1	3.70536	1.45626	-2.2491	2.16×10-50	2.42×10-49
RAP2C	5.01852	2.77159	-2.24693	1.67×10-44	1.08×10-43
ZSCAN18	4.86994	2.62327	-2.24667	1.05×10-58	4.91×10-57
DDR2	3.44972	1.20788	-2.24184	1.28×10-58	5.84×10-57
ABCC9	2.61085	0.37112	-2.23973	8.9×10-61	1.16×10-58
AHNAK	6.55062	4.31116	-2.23946	7.57×10-57	2.29×10-55
RPL39P3	6.35572	4.11764	-2.23808	2.56×10-40	1.25×10-39
AC011603.2	2.47529	0.23761	-2.23768	1.53×10-22	3.26×10-22
GATD3B	2.89734	0.664463	-2.23287	3.66×10-26	8.96×10-26
SOCS2-AS1	2.66782	0.437759	-2.23006	3.25×10-52	4.54×10-51
CCZ1B	3.17126	0.943805	-2.22745	1.63×10-22	3.45×10-22
C8orf88	2.69588	0.470317	-2.22556	6.35×10-57	1.95×10-55
AC138932.1	2.54733	0.322084	-2.22524	4.34×10-50	4.72×10-49
ECM2	2.96924	0.750102	-2.21914	5.26×10-58	2.03×10-56
GTF2IP4	3.56169	1.34409	-2.2176	8.29×10-46	5.95×10-45
NAALADL1	3.08678	0.869862	-2.21692	5.7×10-55	1.18×10-53
CHMP4A	3.67826	1.46152	-2.21674	2.87×10-24	6.53×10-24
COPZ2	3.9429	1.7264	-2.2165	4.63×10-54	8.33×10-53
PPM1K	3.40237	1.18601	-2.21636	2.57×10-60	2.37×10-58
CDC42EP3	4.42038	2.20423	-2.21615	3.15×10-53	5.07×10-52
MYZAP	2.70969	0.495665	-2.21403	1.87×10-57	6.42×10-56
NAP1L1	6.67887	4.46566	-2.21321	1.09×10-55	2.53×10-54
PYURF	3.77185	1.55912	-2.21273	1.01×10-39	4.8×10-39
FEZ1	3.01081	0.803361	-2.20745	3.67×10-55	7.81×10-54
PDGFRB	5.72281	3.51676	-2.20604	6.04×10-52	8.16×10-51
CPED1	2.93526	0.729767	-2.20549	1.5×10-59	9.46×10-58
ADAMTSL5	2.79794	0.593061	-2.20487	7.64×10-55	1.55×10-53
C1R	6.90303	4.69829	-2.20474	4.38×10-53	6.89×10-52
PLXNB3	3.065	0.861211	-2.20379	2.27×10-35	8.43×10-35
ARMCX4	2.72702	0.523361	-2.20366	3.92×10-60	3.11×10-58
RBM5	5.69337	3.49096	-2.20241	1.29×10-43	7.83×10-43
SRSF5	7.06299	4.86656	-2.19643	1.42×10-57	5.01×10-56
ABHD16A	3.57754	1.38127	-2.19626	4.7×10-28	1.24×10-27
NEURL1	2.68432	0.48839	-2.19593	1.92×10-51	2.45×10-50
ADIRF-AS1	2.7531	0.557845	-2.19525	1.37×10-55	3.13×10-54
AC012085.2	2.34773	0.153735	-2.194	4.63×10-56	1.14×10-54
PI4KAP2	2.86494	0.672773	-2.19217	1.16×10-31	3.58×10-31
STARD9	2.53166	0.340329	-2.19133	1.94×10-60	1.97×10-58
AP003108.2	2.36655	0.17696	-2.18959	9.89×10-22	2.04×10-21
PKDCC	5.67934	3.49083	-2.18851	1.39×10-30	4.09×10-30
SNHG14	3.22436	1.03829	-2.18607	6.67×10-52	8.95×10-51
NPHP3	3.15387	0.969551	-2.18432	2.9×10-51	3.62×10-50
PHC1	3.85758	1.67529	-2.1823	1.36×10-43	8.23×10-43
HERC2P2	4.27012	2.08837	-2.18176	2.31×10-28	6.17×10-28
FAM219B	3.77474	1.59332	-2.18142	1.15×10-44	7.59×10-44
GTF2I	4.13666	1.95564	-2.18102	1.11×10-29	3.15×10-29
HBA1	3.39569	1.21509	-2.1806	4.65×10-20	9.07×10-20
FLT3LG	2.74432	0.568003	-2.17632	1.15×10-51	1.51×10-50
N4BP2L1	3.27693	1.10376	-2.17317	8.99×10-60	6.21×10-58
HIC1	3.32141	1.14967	-2.17174	8.14×10-55	1.64×10-53
ITGA5	5.24981	3.0785	-2.17131	4.89×10-42	2.69×10-41
TSPAN4	5.12324	2.95469	-2.16855	8.87×10-51	1.05×10-49
RPS3A	9.36861	7.20026	-2.16835	2.6×10-54	4.85×10-53
EHD2	5.70307	3.53524	-2.16783	3.43×10-53	5.46×10-52
ZEB2	2.81097	0.643712	-2.16726	2.38×10-56	6.25×10-55
PPP1R12A	4.38824	2.22099	-2.16725	1.83×10-57	6.3×10-56
THBS1	5.66201	3.49476	-2.16725	2.22×10-35	8.27×10-35
CASQ2	2.52647	0.359354	-2.16711	6.92×10-57	2.11×10-55
LUC7L3	6.03001	3.86433	-2.16568	1.02×10-43	6.28×10-43
COL5A1	5.47363	3.30901	-2.16462	3.63×10-42	2×10-41
RPS27L	4.8898	2.72555	-2.16424	1.46×10-37	6.09×10-37
RPL10	10.303	8.14302	-2.15993	8.56×10-55	1.71×10-53
CAMK1	3.47843	1.31927	-2.15916	8.82×10-53	1.33×10-51
NR2F1	4.40001	2.24392	-2.15608	2.58×10-50	2.87×10-49
N4BP2L2	4.33466	2.18084	-2.15382	3.08×10-55	6.65×10-54
TRO	3.54627	1.39568	-2.15059	6.74×10-40	3.22×10-39
GBP2	5.21339	3.06564	-2.14775	1.04×10-49	1.09×10-48
COL6A2	8.21085	6.0643	-2.14655	6.92×10-47	5.47×10-46
STAG3L3	2.5351	0.388618	-2.14648	2.38×10-30	6.92×10-30
RUFY3	4.00685	1.86083	-2.14602	5.59×10-46	4.06×10-45
PIEZO1	4.80909	2.6661	-2.143	3.68×10-42	2.03×10-41
ACACB	3.06458	0.921643	-2.14294	2.31×10-57	7.76×10-56
LINC00667	3.23658	1.09411	-2.14247	9.69×10-60	6.56×10-58
AC080038.2	2.7453	0.602938	-2.14237	2.01×10-55	4.46×10-54
CIRBP	7.43849	5.29655	-2.14194	1.94×10-59	1.16×10-57
TBC1D2B	3.82091	1.6794	-2.14151	5.3×10-61	8.86×10-59
DIPK2B	3.50686	1.36586	-2.14099	9.5×10-53	1.43×10-51
PKD2	4.77601	2.63843	-2.13758	1.54×10-59	9.64×10-58
HSPG2	5.87353	3.73599	-2.13754	5.14×10-39	2.33×10-38
FBN1	3.64876	1.51129	-2.13747	1.46×10-49	1.5×10-48
LTBP3	6.13321	3.99634	-2.13687	3.38×10-49	3.36×10-48
DMTF1	4.59019	2.45369	-2.13649	1.54×10-41	8.17×10-41
FUNDC2	4.85739	2.72113	-2.13625	1.49×10-45	1.05×10-44
LINC-PINT	2.83481	0.699423	-2.13539	2.4×10-56	6.29×10-55
STARD5	2.48451	0.349225	-2.13529	1.46×10-53	2.47×10-52
C1QTNF1	3.73569	1.60084	-2.13485	3.92×10-49	3.86×10-48
MBNL1-AS1	2.61603	0.482013	-2.13401	7.8×10-56	1.87×10-54
GSDME	3.08692	0.95394	-2.13298	2.41×10-54	4.54×10-53
PEAR1	2.95721	0.826645	-2.13057	7.41×10-55	1.51×10-53
COL6A1	8.01833	5.88953	-2.1288	6.07×10-48	5.32×10-47
PSMA6	3.97412	1.84535	-2.12877	5.49×10-25	1.28×10-24
MRPS24	4.22617	2.09792	-2.12826	1.5×10-28	4.03×10-28
KLF9	4.39781	2.26968	-2.12814	1.17×10-53	2×10-52
PHYHIP	2.76671	0.639907	-2.12681	3.5×10-59	1.94×10-57
HSD17B6	2.72327	0.597669	-2.1256	6.82×10-53	1.04×10-51
LINC00893	2.77706	0.657982	-2.11907	2.31×10-36	9.04×10-36
HERC3	3.40134	1.28325	-2.11809	1.35×10-46	1.04×10-45
GABRE	2.86437	0.751224	-2.11314	4.89×10-41	2.5×10-40
PDZRN3	4.69612	2.58307	-2.11304	4.31×10-47	3.46×10-46
VSIR	4.70475	2.59182	-2.11293	1.44×10-54	2.82×10-53
NDRG4	3.37488	1.26287	-2.11201	7.2×10-43	4.16×10-42
NSUN5P2	2.85574	0.743811	-2.11193	1.48×10-22	3.14×10-22
EBF4	4.4077	2.30144	-2.10626	6.59×10-51	7.89×10-50
AHSA2P	4.4694	2.3658	-2.1036	1.48×10-32	4.75×10-32
DMD	2.79429	0.690893	-2.1034	1.17×10-58	5.49×10-57
DTWD1	3.17932	1.07919	-2.10014	5.78×10-56	1.4×10-54
EMP3	6.04986	3.95019	-2.09968	8.93×10-53	1.34×10-51
PRRX1	4.54094	2.44126	-2.09967	4.33×10-40	2.09×10-39
SNED1	3.15811	1.06192	-2.09619	6.65×10-58	2.55×10-56
NUPR1	5.92506	3.82922	-2.09584	1.03×10-37	4.35×10-37
UBR4	4.85011	2.7581	-2.092	5.69×10-39	2.58×10-38
EZH1	4.53991	2.44824	-2.09166	7.83×10-62	4.94×10-59
HSPB2	2.61558	0.524001	-2.09158	1.6×10-58	7.14×10-57
GPIHBP1	2.41862	0.329177	-2.08944	9.72×10-59	4.59×10-57
TMEM35B	3.82265	1.73491	-2.08773	1.02×10-54	2.03×10-53
HBA2	4.56375	2.47643	-2.08731	1.86×10-23	4.11×10-23
AC116533.1	6.78107	4.69399	-2.08708	8.35×10-42	4.5×10-41
APOL3	3.77827	1.69178	-2.08649	3.73×10-51	4.6×10-50
SERTM1	3.04428	0.960688	-2.08359	3.39×10-46	2.52×10-45
MFGE8	7.01786	4.93455	-2.08331	2.59×10-46	1.95×10-45
RPL31	9.42126	7.33929	-2.08197	2.58×10-44	1.65×10-43
NDST2	2.58276	0.500894	-2.08187	1.16×10-34	4.14×10-34
SORBS3	6.09268	4.01187	-2.08081	5.77×10-55	1.19×10-53
SPNS1	2.83216	0.753975	-2.07818	3.93×10-22	8.23×10-22
LINC01001	2.37427	0.297937	-2.07633	3.43×10-24	7.78×10-24
CALCOCO2	5.01574	2.9422	-2.07354	5.21×10-61	8.86×10-59
LENG8	6.47512	4.40448	-2.07064	6.42×10-46	4.65×10-45
CAPN3	2.23552	0.164933	-2.07059	1.26×10-48	1.18×10-47
PLAGL1	3.36599	1.29649	-2.0695	1.42×10-48	1.32×10-47
GTF2IRD2	2.62412	0.556118	-2.068	5.76×10-54	1.02×10-52
ELN	4.72915	2.66178	-2.06737	3.62×10-36	1.4×10-35
PTH1R	3.14882	1.08336	-2.06546	3.07×10-47	2.5×10-46
WDR27	3.59283	1.52745	-2.06538	7.3×10-33	2.37×10-32
HLF	2.58389	0.521553	-2.06233	2.06×10-58	8.93×10-57
WSB1	5.56233	3.50081	-2.06152	6.99×10-40	3.34×10-39
LHFPL6	5.11258	3.05212	-2.06046	4.44×10-50	4.84×10-49
RPL13	10.0494	7.99141	-2.05803	3.37×10-39	1.55×10-38
GEM	4.40141	2.34361	-2.05781	4.73×10-41	2.42×10-40
TRIOBP	4.13505	2.07952	-2.05553	7.48×10-50	7.95×10-49
TACR2	2.75946	0.704854	-2.05461	3.98×10-45	2.73×10-44
HOXD11	2.81818	0.763799	-2.05438	1.11×10-34	4×10-34
FYN	4.57701	2.52287	-2.05414	7.32×10-57	2.22×10-55
EFS	3.98226	1.92864	-2.05362	7.7×10-42	4.17×10-41
CTSK	6.10082	4.04867	-2.05215	4.27×10-41	2.19×10-40
ZNF280D	3.44909	1.40017	-2.04893	1.77×10-56	4.83×10-55
CCDC9B	3.28538	1.23698	-2.04841	1.21×10-50	1.41×10-49
EFEMP2	5.69799	3.65091	-2.04708	3.27×10-49	3.26×10-48
EIF3L	7.06879	5.02314	-2.04565	1.01×10-53	1.74×10-52
EGFL7	5.68278	3.64002	-2.04276	3.13×10-41	1.62×10-40
SAMD4A	2.96504	0.922713	-2.04233	6.04×10-53	9.33×10-52
SHC2	4.00792	1.96561	-2.04232	1.36×10-42	7.73×10-42
ZFPM2	2.35054	0.308383	-2.04216	1.51×10-60	1.71×10-58
LPP	4.29737	2.25859	-2.03879	4.98×10-55	1.04×10-53
TFPI	3.04582	1.00885	-2.03697	7.76×10-48	6.68×10-47
HOXA11	4.73865	2.70192	-2.03673	4.4×10-32	1.38×10-31
ECSCR	3.66577	1.63028	-2.03549	2.41×10-47	1.99×10-46
WASH7P	2.56778	0.533909	-2.03388	9.1×10-39	4.07×10-38
SRRM2	7.52305	5.48993	-2.03312	1.61×10-43	9.67×10-43
GET4	2.83871	0.807915	-2.03079	3.59×10-24	8.15×10-24
DENND3	3.26567	1.23985	-2.02582	2.27×10-42	1.27×10-41
TTC7B	3.01586	0.990642	-2.02522	9.93×10-42	5.33×10-41
ROBO3	2.68499	0.659904	-2.02508	4.85×10-52	6.63×10-51
NRP2	4.31442	2.29091	-2.02351	1.77×10-43	1.06×10-42
DNAJB6	4.60754	2.58425	-2.02329	1.45×10-41	7.65×10-41
NRXN2	2.93332	0.910761	-2.02256	9.83×10-53	1.47×10-51
PRPF40B	3.23496	1.21307	-2.02189	6.17×10-37	2.49×10-36
TBX3	3.79637	1.77475	-2.02163	9.74×10-49	9.21×10-48
MEF2C	2.9974	0.976935	-2.02046	3.11×10-61	6.89×10-59
MMP19	3.19738	1.17696	-2.02042	4.23×10-46	3.1×10-45
SNX15	2.22525	0.205202	-2.02004	1.12×10-43	6.88×10-43
AOX1	2.37692	0.357693	-2.01922	3.88×10-57	1.25×10-55
LRCH4	3.64673	1.62754	-2.01919	2.67×10-26	6.57×10-26
ARGLU1	6.15619	4.13731	-2.01888	7.73×10-48	6.66×10-47
RBM34	2.83949	0.820916	-2.01858	3.04×10-21	6.17×10-21
PTGFR	2.19322	0.175035	-2.01818	4.88×10-60	3.69×10-58
ABCA9	2.29312	0.276281	-2.01684	3.94×10-57	1.27×10-55
MAF	3.70316	1.68751	-2.01565	3.5×10-55	7.48×10-54
STXBP1	4.033	2.01777	-2.01523	1.4×10-56	3.93×10-55
STRADA	3.16735	1.15228	-2.01507	5.64×10-35	2.05×10-34
MITF	3.89275	1.8784	-2.01435	2.19×10-48	2×10-47
DIXDC1	3.23405	1.2198	-2.01425	1.24×10-61	4.94×10-59
TWIST2	3.78847	1.77429	-2.01418	4.09×10-41	2.1×10-40
KCNE4	2.92215	0.909002	-2.01315	5.15×10-44	3.22×10-43
EHBP1L1	5.19481	3.18563	-2.00917	3.5×10-48	3.13×10-47
PHYKPL	4.22771	2.2191	-2.00861	1.72×10-39	7.99×10-39
TUBE1	3.39985	1.39386	-2.00599	1.92×10-53	3.16×10-52
MAP3K20	4.35134	2.34583	-2.0055	1.86×10-60	1.91×10-58
MEIS1	5.36891	3.36458	-2.00433	1.18×10-41	6.28×10-41
CCZ1	3.04483	1.04069	-2.00413	3.22×10-25	7.59×10-25
FHL5	2.28495	0.283365	-2.00159	7.39×10-58	2.76×10-56
FRY	2.68987	0.689717	-2.00015	9.52×10-57	2.8×10-55
RPS3AP6	3.36618	1.36607	-2.00011	6.1×10-48	5.34×10-47
CYB561	2.9923	4.99249	2.00019	3.93×10-46	2.89×10-45
IGLV1-47	1.16669	3.16729	2.00061	3.44×10-19	6.5×10-19
RACGAP1	1.29625	3.29975	2.0035	2.24×10-59	1.32×10-57
UCA1	1.27623	3.28	2.00378	5.84×10-24	1.31×10-23
IKBKE	0.955721	2.95977	2.00404	2.52×10-59	1.46×10-57
TTC9	0.76469	2.76879	2.0041	2.81×10-44	1.79×10-43
ABHD17C	1.42563	3.43111	2.00548	2.68×10-54	4.98×10-53
NCAPG	0.250411	2.25977	2.00936	5.37×10-61	8.86×10-59
MRPL15	3.64693	5.65719	2.01026	1.27×10-56	3.6×10-55
AC083799.1	1.83068	3.84155	2.01087	1.79×10-51	2.3×10-50
MAP2K6	0.871717	2.88503	2.01331	3.01×10-51	3.74×10-50
IGHG2	3.03476	5.04881	2.01405	2.02e-14	3.28e-14
STEAP3	1.46557	3.48192	2.01635	3.79×10-42	2.09×10-41
SCNN1G	0.571339	2.58833	2.01699	3.62×10-32	1.14×10-31
RPL37P2	1.237	3.25487	2.01786	1.13×10-35	4.27×10-35
CYBA	4.31915	6.33814	2.01899	2.53×10-47	2.08×10-46
MDK	6.63068	8.6515	2.02082	2.43×10-40	1.19×10-39
UQCR10	4.93822	6.95935	2.02113	7.69×10-55	1.55×10-53
MSI1	1.55256	3.57743	2.02486	2.09×10-40	1.03×10-39
DCDC2	0.663899	2.69023	2.02633	1.3×10-38	5.75×10-38
SMIM6	0.661683	2.68807	2.02639	5.66×10-33	1.85×10-32
IGLV6-57	0.760247	2.7883	2.02805	3.63×10-25	8.52×10-25
NUF2	0.361424	2.39235	2.03093	3.47×10-59	1.93×10-57
MSLN	2.41053	4.44159	2.03106	5.09e-16	8.68e-16
FNDC10	0.764055	2.79575	2.03169	1.29×10-44	8.47×10-44
IGHJ2	0.341251	2.37402	2.03277	1.56e-16	2.71e-16
CST1	0.490452	2.52371	2.03326	1.04×10-25	2.5×10-25
FAAH2	0.897954	2.93138	2.03342	2.34×10-46	1.76×10-45
ST6GALNAC1	1.54351	3.57899	2.03548	1.24×10-31	3.82×10-31
PLEK2	0.541432	2.5794	2.03796	2.07×10-51	2.63×10-50
MND1	0.358647	2.39665	2.03801	9.96×10-61	1.22×10-58
MECOM	2.30952	4.34789	2.03837	6.73×10-48	5.86×10-47
TMEM97	2.08201	4.12314	2.04113	1.86×10-51	2.38×10-50
EPS8L1	1.995	4.03749	2.04248	5.98×10-36	2.29×10-35
GPR160	0.810908	2.85527	2.04436	1.69×10-49	1.73×10-48
SEPHS2	3.36794	5.41242	2.04448	2.72×10-56	7.06×10-55
IGLV2-11	1.28301	3.32814	2.04513	2.19×10-18	4.04×10-18
MYO5B	0.664338	2.70948	2.04514	4.77×10-52	6.53×10-51
COL9A2	2.05021	4.09917	2.04896	5.55×10-39	2.52×10-38
AC004816.1	0.369503	2.41886	2.04935	4.98×10-61	8.86×10-59
TNFRSF21	2.90416	4.95408	2.04992	8.29×10-44	5.11×10-43
HOOK1	0.653145	2.70551	2.05237	1.21×10-53	2.07×10-52
MFSD3	2.35378	4.40785	2.05407	2.37×10-54	4.47×10-53
CRABP1	0.152875	2.20697	2.0541	3.75×10-40	1.82×10-39
STAP2	2.43051	4.48904	2.05853	4.94×10-44	3.09×10-43
SPC25	0.285308	2.34555	2.06025	3.13×10-60	2.7×10-58
PAQR4	1.00097	3.06341	2.06244	7.29×10-56	1.75×10-54
THEM6	2.32104	4.38515	2.06411	1.54×10-52	2.26×10-51
AC084866.1	0.65832	2.72367	2.06535	2.77e-16	4.78e-16
TTK	0.257913	2.32575	2.06784	9.4×10-61	1.2×10-58
ELMO3	1.51189	3.58084	2.06895	6.73×10-38	2.87×10-37
TMC5	0.478771	2.54977	2.071	2.7×10-44	1.73×10-43
KRT5	0.955754	3.02735	2.0716	7.32×10-19	1.37×10-18
C1orf53	0.859379	2.93208	2.0727	1.12×10-56	3.24×10-55
IGKV3-20	2.48734	4.56472	2.07738	4.98e-16	8.51e-16
FZD10	0.945707	3.0288	2.0831	4.52×10-34	1.57×10-33
IGLV1-51	1.62671	3.7132	2.08648	1.64×10-23	3.64×10-23
PRKCD	2.61447	4.70211	2.08764	9.11×10-50	9.6×10-49
CDKN3	0.81413	2.90431	2.09018	9.3×10-58	3.42×10-56
TIMM23	3.83121	5.92178	2.09058	5.18×10-57	1.63×10-55
IGKV3-15	1.32485	3.41621	2.09136	1.94×10-19	3.69×10-19
SKA1	0.201499	2.29389	2.09239	1.24×10-61	4.94×10-59
B4GALNT3	1.96321	4.05641	2.0932	4.13×10-39	1.89×10-38
MEST	2.50127	4.59482	2.09355	1.31×10-47	1.11×10-46
FUT2	0.782784	2.87702	2.09423	9.84×10-47	7.68×10-46
RNF183	0.513994	2.60825	2.09426	4.61×10-48	4.07×10-47
CXCL1	0.761345	2.86093	2.09958	4.04×10-32	1.27×10-31
ACY3	0.484313	2.5853	2.10099	2.93×10-45	2.03×10-44
HIST1H3D	0.549395	2.65375	2.10436	5.21×10-59	2.67×10-57
PLEKHS1	0.447159	2.55279	2.10563	1.73×10-36	6.81×10-36
AGR3	0.979594	3.08575	2.10616	1.06×10-27	2.75×10-27
GALNT3	1.06444	3.17211	2.10767	1.42×10-41	7.55×10-41
VPS9D1-AS1	1.01637	3.12652	2.11016	5.46×10-49	5.29×10-48
AC113398.1	0.490345	2.60073	2.11038	2.51×10-41	1.31×10-40
SULT2B1	0.243357	2.35544	2.11208	8.78×10-52	1.17×10-50
GGH	1.55347	3.66591	2.11244	1.46×10-53	2.46×10-52
PIMREG	0.263754	2.3768	2.11304	3.83×10-59	2.06×10-57
AC099850.3	0.326028	2.44002	2.11399	2.45×10-56	6.4×10-55
HIST1H2AC	2.65437	4.76874	2.11436	8.56×10-37	3.43×10-36
FOXQ1	0.53747	2.65664	2.11917	7.69×10-41	3.88×10-40
ANLN	0.454292	2.57396	2.11967	1.73×10-59	1.06×10-57
PROM2	1.46852	3.58874	2.12022	1.17×10-43	7.15×10-43
EXOSC4	3.05056	5.17454	2.12398	7.99×10-58	2.96×10-56
RAB11FIP4	0.689325	2.8179	2.12857	7.64×10-57	2.3×10-55
RMI2	0.892532	3.02276	2.13023	6.54×10-60	4.72×10-58
ZDHHC12	2.66764	4.79924	2.13161	1.56×10-56	4.35×10-55
TMEM30B	1.29186	3.42568	2.13382	2.59×10-34	9.12×10-34
CCND1	3.04811	5.18333	2.13522	1.17×10-31	3.6×10-31
APOE	4.22732	6.36571	2.13839	2.02×10-28	5.41×10-28
DACT2	1.25462	3.39343	2.1388	2.66×10-29	7.42×10-29
WNT7A	0.321771	2.46368	2.14191	7.88×10-36	3×10-35
JPT2	3.40575	5.54959	2.14384	2.2×10-52	3.16×10-51
MCM4	2.00042	4.14432	2.1439	1.44×10-59	9.08×10-58
SLC2A1	3.35127	5.49606	2.14479	7.64×10-49	7.3×10-48
MRPL14	4.04203	6.18833	2.1463	1.04×10-58	4.9×10-57
TMPRSS2	0.446671	2.59375	2.14708	6.77×10-49	6.5×10-48
TYMS	1.61572	3.76704	2.15132	3.04×10-55	6.58×10-54
UHRF1	0.2744	2.4312	2.1568	6.6×10-61	9.74×10-59
TMSB4XP8	2.87919	5.03604	2.15685	1.83×10-26	4.53×10-26
CXCR4	3.11853	5.28001	2.16149	5.64×10-37	2.28×10-36
RECQL4	1.45186	3.61775	2.1659	5.59×10-58	2.16×10-56
LTB	0.911687	3.07997	2.16829	2.09×10-43	1.24×10-42
HIST1H2BD	2.61402	4.78374	2.16972	3.32×10-32	1.05×10-31
PITX1	0.280284	2.45067	2.17039	1.14×10-49	1.18×10-48
PCNA	4.21394	6.38441	2.17047	3.31×10-56	8.44×10-55
PPIF	2.92491	5.09569	2.17078	1.53×10-55	3.47×10-54
FRAT2	1.70461	3.87866	2.17405	6.1×10-59	3.09×10-57
PLS1	0.48614	2.66234	2.1762	1.58×10-56	4.4×10-55
DNAJC22	0.429141	2.60591	2.17677	2.86×10-51	3.58×10-50
RPL13AP25	1.56219	3.74012	2.17792	1.57×10-22	3.35×10-22
CDC42BPG	0.614311	2.79412	2.17981	1.05×10-51	1.39×10-50
AL122020.1	1.06476	3.24478	2.18002	6.94×10-38	2.95×10-37
CCL20	0.333025	2.5147	2.18168	4.57×10-45	3.12×10-44
EPN3	0.676046	2.86576	2.18971	2.44×10-44	1.56×10-43
AGRN	3.44719	5.64346	2.19627	2.92×10-48	2.63×10-47
KIF12	1.42034	3.61792	2.19758	1.73×10-26	4.27×10-26
AL157931.1	0.524383	2.72471	2.20032	8.2×10-32	2.54×10-31
CIB1	4.82122	7.02295	2.20172	6.84×10-47	5.41×10-46
CELSR1	1.4745	3.6768	2.2023	2.91×10-46	2.18×10-45
AGPAT2	4.07338	6.27668	2.2033	1.04×10-49	1.08×10-48
TRIP13	0.838682	3.04375	2.20507	2.71×10-58	1.14×10-56
GTSE1	0.343819	2.54962	2.2058	5.4×10-61	8.86×10-59
HIST1H4I	0.973792	3.17989	2.2061	1.13×10-43	6.92×10-43
CCNA2	1.23825	3.44749	2.20924	1.91×10-56	5.2×10-55
MAL	1.23303	3.44879	2.21577	4.73×10-22	9.9×10-22
RAB20	2.20412	4.42001	2.21589	5.58×10-52	7.59×10-51
PRR7	1.04387	3.26061	2.21675	1.11×10-54	2.19×10-53
SYTL1	1.34195	3.55941	2.21746	7.97×10-47	6.27×10-46
CALR	7.19981	9.42044	2.22063	1.22×10-59	8.04×10-58
CENPU	0.762264	2.98543	2.22317	9.57×10-60	6.5×10-58
NCMAP	0.300881	2.52421	2.22332	8.13×10-54	1.42×10-52
IGLV2-23	1.25822	3.48407	2.22585	1.87×10-21	3.83×10-21
GINS1	0.571804	2.79885	2.22704	2.15×10-60	2.08×10-58
HIST3H2A	2.19207	4.42053	2.22845	1.65×10-46	1.26×10-45
ILDR1	0.539141	2.76948	2.23034	3.16×10-47	2.58×10-46
C6orf132	0.603847	2.83503	2.23118	6.19×10-53	9.52×10-52
TMPRSS3	0.538547	2.77227	2.23372	9.6×10-45	6.37×10-44
HPN	1.22918	3.4659	2.23672	4.7×10-29	1.29×10-28
ECT2	1.1391	3.37665	2.23755	3.53×10-59	1.94×10-57
TFAP2A	0.27541	2.51388	2.23847	1.21×10-51	1.59×10-50
TEDC2	0.520061	2.75904	2.23898	3.21×10-60	2.72×10-58
CHGA	0.551173	2.79058	2.23941	5.94×10-24	1.34×10-23
PKMYT1	0.402165	2.64237	2.24021	7.6×10-59	3.7×10-57
COL26A1	0.364703	2.60725	2.24255	4.65×10-40	2.24×10-39
PPP1R14C	0.638418	2.88489	2.24647	1×10-41	5.36×10-41
KIF1A	0.266357	2.51305	2.24669	3.77×10-35	1.38×10-34
RNF208	2.06933	4.3169	2.24757	2.76×10-46	2.07×10-45
APOC1	2.05589	4.30452	2.24863	1.81×10-39	8.39×10-39
TMPRSS13	0.261474	2.51015	2.24867	3.76×10-55	7.99×10-54
SDF2L1	3.63385	5.88679	2.25295	1.68×10-53	2.81×10-52
NRTN	0.576846	2.82995	2.25311	1.95×10-45	1.36×10-44
IGLV2-14	1.88471	4.14021	2.2555	1.73×10-18	3.2e-18
BAIAP2L1	1.51243	3.76796	2.25553	2.91×10-57	9.59×10-56
IGHV5-51	1.16093	3.41832	2.25739	4.55×10-23	9.88×10-23
AL023284.4	0.737129	2.99511	2.25798	3.67×10-49	3.63×10-48
AC007906.2	1.1887	3.44825	2.25955	1.17×10-30	3.46×10-30
FBP1	1.28504	3.54551	2.26047	2.3×10-40	1.13×10-39
TSPAN33	1.24151	3.5034	2.26189	5.5×10-54	9.79×10-53
MREG	0.853874	3.11606	2.26219	4.87×10-59	2.52×10-57
AC004967.1	0.914932	3.17725	2.26231	4.87×10-56	1.19×10-54
CCNA1	1.15629	3.41871	2.26241	5.34×10-29	1.47×10-28
SNRPGP2	1.64579	3.91066	2.26486	8.26×10-57	2.48×10-55
GJB2	0.791021	3.05786	2.26684	1.44×10-42	8.16×10-42
SPTBN2	1.11195	3.37928	2.26732	7.29×10-55	1.48×10-53
KIF18B	0.206884	2.47497	2.26809	6.69×10-61	9.78×10-59
CDC6	0.406787	2.67657	2.26978	1.33×10-61	4.94×10-59
ETV4	0.849585	3.12182	2.27224	2.5×10-42	1.4×10-41
CDS1	1.08416	3.3608	2.27664	3.87×10-46	2.85×10-45
RNASEH2A	2.56166	4.83863	2.27698	6.29×10-59	3.17×10-57
NOXA1	2.41148	4.68965	2.27816	2.98×10-43	1.76×10-42
CA9	0.562824	2.84774	2.28491	3.12×10-40	1.52×10-39
CNFN	1.15208	3.4379	2.28582	7.61×10-48	6.57×10-47
EIF4EBP1	3.79259	6.08765	2.29506	6.48×10-54	1.14×10-52
ECHS1	4.9796	7.27679	2.29719	1.07×10-54	2.12×10-53
TNFRSF18	0.524557	2.82508	2.30052	3.03×10-51	3.76×10-50
GSR	3.21797	5.51984	2.30187	2.82×10-51	3.52×10-50
SKA3	0.254575	2.55845	2.30387	2.52×10-61	6.69×10-59
OCIAD2	3.24694	5.55092	2.30397	3.27×10-57	1.06×10-55
HES6	2.4421	4.74907	2.30697	3.66×10-45	2.52×10-44
VAV3	0.953124	3.26426	2.31114	3.31×10-49	3.3×10-48
MAP7	0.90849	3.22144	2.31295	4.93×10-54	8.85×10-53
IGHG4	1.78868	4.10219	2.3135	3.41×10-20	6.67×10-20
LLGL2	2.29508	4.62146	2.32638	1.05×10-53	1.82×10-52
FAM110A	1.29751	3.62695	2.32944	9.74×10-61	1.21×10-58
TSPAN13	2.99983	5.33228	2.33245	1.84×10-46	1.4×10-45
GALNT6	0.666462	3.00134	2.33488	2.38×10-54	4.49×10-53
GLYATL2	0.226428	2.56823	2.3418	5×10-22	1.05×10-21
STC2	0.833179	3.1758	2.34262	4.31×10-53	6.79×10-52
CDCP1	1.46987	3.81916	2.34929	5.88×10-56	1.43×10-54
MARVELD2	0.633603	2.99107	2.35747	3.62×10-53	5.75×10-52
BUB1B	0.387881	2.74702	2.35914	2.19×10-60	2.1×10-58
RBBP8NL	0.322575	2.68279	2.36022	2.74×10-56	7.09×10-55
SNORD99	0.540773	2.9021	2.36133	1.23×10-47	1.04×10-46
JSRP1	0.406783	2.77127	2.36449	2.31×10-53	3.74×10-52
SAMD10	0.917532	3.28213	2.3646	2×10-54	3.81×10-53
IGHV4-39	1.12609	3.49136	2.36527	2.02×10-24	4.61×10-24
PRRG2	0.931424	3.29691	2.36548	1.11×10-56	3.21×10-55
ARHGEF16	0.608727	2.97578	2.36706	4.3×10-58	1.7×10-56
GRB7	1.41337	3.78236	2.369	7.79×10-43	4.48×10-42
IGLV3-19	1.30454	3.67521	2.37068	8.62×10-23	1.85×10-22
BUB1	0.333033	2.70489	2.37186	1.34×10-61	4.94×10-59
CAPN13	0.194102	2.56965	2.37555	2.11×10-52	3.02×10-51
EVPL	1.02432	3.40444	2.38012	1.24×10-48	1.15×10-47
GOLT1A	0.375009	2.758	2.38299	8.01×10-50	8.48×10-49
KIAA1522	2.87273	5.2634	2.39066	3.4×10-50	3.74×10-49
CSTB	4.50459	6.89999	2.3954	7.71×10-58	2.87×10-56
PERP	3.48819	5.8838	2.39561	7.98×10-44	4.93×10-43
AP001024.1	0.68887	3.0845	2.39563	4.11×10-39	1.88×10-38
RAC3	1.29389	3.69298	2.39909	5.56×10-56	1.35×10-54
SYNE4	0.991612	3.3911	2.39948	7.39×10-52	9.87×10-51
AL355338.1	1.34121	3.74429	2.40308	4.43×10-57	1.41×10-55
PPP1R14BP3	1.79167	4.1956	2.40393	4.57×10-39	2.08×10-38
IGLV3-21	1.0606	3.46519	2.40459	2.52×10-24	5.74×10-24
AC007996.1	0.610619	3.01769	2.40707	1.2×10-55	2.75×10-54
SEZ6L2	2.05182	4.46633	2.4145	3.5×10-33	1.16×10-32
NUAK2	0.985626	3.40257	2.41694	2.74×10-48	2.47×10-47
IGSF9	0.792614	3.2099	2.41729	5.6×10-51	6.75×10-50
HOXB7	2.22767	4.64683	2.41915	6.82×10-38	2.9×10-37
SLC29A2	1.29794	3.71838	2.42045	8.91×10-56	2.11×10-54
PHLDA2	1.41132	3.83508	2.42376	1.13×10-49	1.17×10-48
CENPA	0.242553	2.67108	2.42852	3.54×10-61	7.37×10-59
IGHG3	2.11838	4.54894	2.43055	2.41×10-19	4.58×10-19
IGKV4-1	1.74256	4.17753	2.43497	1.87×10-21	3.82×10-21
IGLV3-25	1.11042	3.54582	2.43539	1.61×10-23	3.56×10-23
ALDH18A1	3.22532	5.66147	2.43614	4.53×10-57	1.43×10-55
PPP1R1B	1.18277	3.61922	2.43645	3.59×10-31	1.08×10-30
CDKN2A	0.545898	2.98245	2.43655	1.65×10-53	2.77×10-52
NACC1	2.87947	5.31665	2.43719	4.51×10-61	8.56×10-59
RDH10	2.05395	4.49702	2.44308	6.25×10-48	5.46×10-47
IQGAP3	0.279301	2.72284	2.44354	3.71×10-61	7.52×10-59
TMEM139	1.07896	3.52284	2.44388	9.57×10-44	5.87×10-43
IGLC2	3.891	6.33574	2.44474	2.47×10-18	4.56×10-18
LEFTY1	0.400699	2.8511	2.4504	4.88×10-34	1.7×10-33
TRAF4	2.49836	4.96436	2.466	3.74×10-60	3×10-58
NMU	0.174169	2.64143	2.46727	6.95×10-58	2.64×10-56
SNORD60	0.549531	3.0186	2.46906	4.43×10-47	3.55×10-46
CXADR	1.3075	3.7776	2.4701	2.33×10-56	6.16×10-55
CGN	0.92321	3.40022	2.47701	5.37×10-50	5.78×10-49
IGHV3-23	1.46977	3.9487	2.47893	3.08×10-23	6.74×10-23
B4GALT1	4.09366	6.57262	2.47895	1.77×10-47	1.48×10-46
TACC3	1.53662	4.01767	2.48104	9.82×10-61	1.21×10-58
CDC45	0.376334	2.86144	2.48511	2.61×10-61	6.73×10-59
EFNA4	2.15692	4.64269	2.48578	3.07×10-58	1.27×10-56
BICDL2	0.594975	3.08114	2.48617	4.15×10-51	5.07×10-50
IGKV1-5	1.6688	4.15981	2.49101	2.16×10-23	4.76×10-23
RHPN1	1.81758	4.30889	2.49131	5.97×10-55	1.23×10-53
PLK1	0.875778	3.36758	2.49181	3.39×10-60	2.8×10-58
MUC1	4.18382	6.67567	2.49184	1.84×10-37	7.65×10-37
HIST1H2AE	0.902729	3.40911	2.50638	2.16×10-50	2.42×10-49
WWC1	0.7631	3.26975	2.50665	5.7×10-49	5.52×10-48
TMSB10P1	0.474971	2.98202	2.50705	9.35×10-51	1.1×10-49
GGT6	0.478919	2.98609	2.50718	4.2×10-45	2.87×10-44
OVOL2	0.568328	3.07593	2.50761	2.02×10-52	2.91×10-51
SYK	1.29838	3.80664	2.50826	3.82×10-48	3.41×10-47
ALPG	0.196035	2.70452	2.50849	1.15×10-44	7.57×10-44
RPS6KA1	1.67547	4.18445	2.50898	3.82×10-58	1.54×10-56
MCM2	1.84002	4.35012	2.5101	4.64×10-59	2.42×10-57
AC092718.4	0.854953	3.36577	2.51082	6.57×10-57	2.01×10-55
RHPN2	1.43546	3.94976	2.5143	7.32×10-53	1.11×10-51
SGPP2	0.909462	3.42563	2.51616	3.04×10-47	2.48×10-46
NR2F6	3.40254	5.92121	2.51867	1.9×10-58	8.36×10-57
AURKA	0.615161	3.14543	2.53027	5.36×10-62	4.94×10-59
ARL4C	1.55494	4.08674	2.53179	1.21×10-43	7.36×10-43
MMP11	2.58914	5.12543	2.53629	1.14×10-28	3.1×10-28
SOX4	3.39676	5.93595	2.5392	2.81×10-41	1.46×10-40
GPT2	1.5751	4.1163	2.5412	1.07×10-56	3.11×10-55
NCAPH	0.355807	2.89765	2.54185	1.1×10-61	4.94×10-59
KIF4A	0.270803	2.81337	2.54257	2.95×10-61	6.79×10-59
AC025154.2	0.216393	2.75909	2.5427	1.55×10-52	2.26×10-51
TMEM238	0.720603	3.26355	2.54295	5.82×10-50	6.25×10-49
FOXA2	0.802459	3.34809	2.54563	2.04×10-35	7.61×10-35
ENC1	1.31881	3.86699	2.54819	3.84×10-51	4.72×10-50
ABHD11	2.90595	5.45875	2.55279	1.82×10-55	4.06×10-54
PTMAP4	0.635194	3.19167	2.55647	3.63×10-50	3.98×10-49
LRG1	1.09086	3.64831	2.55745	7.29×10-38	3.1×10-37
PDIA4	4.8185	7.38122	2.56272	4.97×10-56	1.22×10-54
IGHV1-18	0.902338	3.46665	2.56432	3.82×10-28	1.01×10-27
HOXB6	1.91178	4.47763	2.56585	6.98×10-31	2.08×10-30
PGD	3.79887	6.36526	2.56639	1.32×10-60	1.54×10-58
MT1F	1.4182	3.9872	2.569	2.05×10-52	2.95×10-51
HIST1H1C	3.39717	5.96853	2.57135	9.99×10-41	5.01×10-40
TUBB4B	5.85179	8.43456	2.58277	7.74×10-49	7.4×10-48
TMEM132A	2.42089	5.00918	2.5883	1.54×10-55	3.49×10-54
CENPF	0.631845	3.22167	2.58982	1.34×10-60	1.55×10-58
IGLV1-40	1.59369	4.18736	2.59368	2.41×10-23	5.29×10-23
LINC00958	0.401708	2.99804	2.59633	5.65×10-57	1.76×10-55
PRSS22	0.637463	3.23626	2.59879	4.26×10-49	4.18×10-48
FAM83D	0.459802	3.06118	2.60138	2.64×10-60	2.4×10-58
DLGAP5	0.205465	2.80927	2.6038	3.86×10-61	7.74×10-59
GJB1	0.886972	3.50104	2.61407	1.98×10-37	8.22×10-37
PROM1	0.779263	3.39874	2.61947	2.79×10-41	1.45×10-40
B3GNT3	0.31058	2.9314	2.62082	2.1×10-49	2.13×10-48
HJURP	0.292299	2.91555	2.62326	6.81×10-61	9.81×10-59
RPL41P5	1.7838	4.43333	2.64953	2.08×10-20	4.09×10-20
KIF11	0.503167	3.15649	2.65332	1.23×10-60	1.47×10-58
TM7SF2	2.11954	4.77418	2.65464	3.42×10-55	7.33×10-54
CP	1.32863	3.98579	2.65716	5.08×10-33	1.67×10-32
CDK1	1.08829	3.74762	2.65934	2.23×10-58	9.54×10-57
CAPS	3.63412	6.30633	2.67221	4.11×10-30	1.19×10-29
CXCL10	0.960445	3.63784	2.6774	1.79×10-43	1.08×10-42
AOC1	0.20484	2.88566	2.68082	1.03×10-51	1.35×10-50
IGHM	2.00578	4.69095	2.68517	1.81×10-23	4×10-23
RASSF7	2.45397	5.14147	2.6875	4.85×10-44	3.03×10-43
ERBB3	1.48192	4.17247	2.69054	4.7×10-52	6.44×10-51
MIR621	0.912663	3.60362	2.69096	2.25×10-43	1.34×10-42
AL035661.1	0.822197	3.51502	2.69283	1.94×10-41	1.02×10-40
CCDC167	2.9665	5.67283	2.70633	8.51×10-61	1.13×10-58
CHMP4C	0.885909	3.59716	2.71125	7.96×10-54	1.39×10-52
LTF	1.13955	3.85393	2.71438	4.99×10-20	9.71×10-20
UPK1B	0.340119	3.05993	2.71981	1.28×10-41	6.79×10-41
DLX6	0.675941	3.39585	2.71991	9.79×10-45	6.49×10-44
TSTD1	2.57898	5.29926	2.72028	1.29×10-45	9.15×10-45
SLC9A3R1	2.93764	5.65877	2.72114	1.61×10-45	1.13×10-44
E2F1	0.827451	3.55092	2.72347	2.71×10-60	2.44×10-58
HOXB5	1.50367	4.22872	2.72504	1.12×10-32	3.63×10-32
SAA1	1.08832	3.82682	2.7385	1.44×10-31	4.41×10-31
RHOV	0.446367	3.19544	2.74907	2.8×10-56	7.23×10-55
POC1A	0.706464	3.45783	2.75137	2.8×10-62	4.94×10-59
SLC25A10	1.53013	4.28578	2.75565	3.66×10-59	2×10-57
ASRGL1	2.46612	5.22353	2.75741	2.01×10-37	8.36×10-37
HIST1H2BH	0.324949	3.08465	2.7597	1.54×10-52	2.25×10-51
SLC44A4	1.86427	4.62556	2.76129	6.24×10-34	2.16×10-33
MT-TL1	0.704015	3.46833	2.76431	1.55×10-41	8.19×10-41
ESRP2	0.664519	3.42884	2.76432	4.22×10-59	2.25×10-57
F11R	2.57343	5.33946	2.76603	2.41×10-56	6.3×10-55
AC025580.1	0.518289	3.28477	2.76648	2.32×10-41	1.21×10-40
TROAP	0.489016	3.25624	2.76723	7.58×10-61	1.02×10-58
C19orf33	1.84941	4.61884	2.76943	2×10-30	5.85×10-30
RAP1GAP	0.854893	3.62928	2.77438	2.39×10-51	3.01×10-50
RHEX	1.93739	4.71278	2.77539	1.66×10-32	5.31×10-32
FEN1	1.75445	4.53189	2.77744	1.27×10-60	1.5×10-58
MMP15	1.75082	4.53514	2.78432	1.05×10-55	2.44×10-54
DBNDD1	0.913397	3.69812	2.78472	7.6×10-60	5.35×10-58
MMP7	3.34412	6.13339	2.78927	1.87×10-20	3.7×10-20
CDCA5	0.589587	3.38556	2.79598	1.13×10-61	4.94×10-59
PCLAF	0.459056	3.25917	2.80012	5.9×10-60	4.3×10-58
IDH2	3.8639	6.66818	2.80428	5.39×10-59	2.75×10-57
S100A2	1.02865	3.83601	2.80736	4.58×10-51	5.57×10-50
KIF2C	0.675356	3.48467	2.80931	3.27×10-61	7.14×10-59
MELK	0.252189	3.06521	2.81302	1.21×10-61	4.94×10-59
ABRACL	2.83792	5.65233	2.8144	3.5×10-59	1.94×10-57
EHF	0.925901	3.74308	2.81718	1.62×10-42	9.12×10-42
AL390719.2	0.681105	3.50332	2.82221	5.57×10-49	5.39×10-48
RCC2	3.59029	6.41596	2.82567	1.17×10-59	7.74×10-58
SEL1L3	1.46474	4.29457	2.82983	4.41×10-59	2.31×10-57
CAMSAP3	0.690688	3.52293	2.83224	4.33×10-54	7.84×10-53
NEK2	0.263272	3.09577	2.8325	8.88×10-62	4.94×10-59
IDO1	0.896186	3.7314	2.83522	9.09×10-48	7.8×10-47
MT1G	1.00782	3.84534	2.83752	1.16×10-48	1.08×10-47
FOXM1	0.585692	3.42434	2.83865	4.24×10-61	8.22×10-59
MEX3A	1.2028	4.04212	2.83932	1.05×10-56	3.06×10-55
HK2	0.998467	3.84097	2.8425	8.88×10-57	2.64×10-55
RBM47	0.959782	3.80416	2.84438	1.78×10-51	2.29×10-50
F2RL1	0.675111	3.5208	2.84569	2.87×10-52	4.03×10-51
ALPL	2.12811	4.97605	2.84793	4.72×10-41	2.41×10-40
PBK	0.258147	3.12335	2.86521	1.43×10-60	1.62×10-58
SPINT1-AS1	0.875744	3.74527	2.86953	2.48×10-50	2.76×10-49
SERPINA1	2.29264	5.16924	2.8766	4.11×10-34	1.43×10-33
KLF5	1.87185	4.75366	2.88181	3.8×10-45	2.61×10-44
SPC24	0.62802	3.51885	2.89083	5.21×10-61	8.86×10-59
TLCD1	0.880808	3.77537	2.89456	2.6×10-57	8.65×10-56
LAPTM4B	4.55132	7.44725	2.89593	2.07×10-50	2.33×10-49
S100A14	1.28316	4.18145	2.89829	1.98×10-37	8.22×10-37
IGHJ3	0.528019	3.43584	2.90783	2.97×10-28	7.89×10-28
SNHG25	1.20258	4.11073	2.90814	1.47×10-49	1.51×10-48
PYCR1	1.95433	4.86563	2.9113	6.78×10-55	1.39×10-53
DSG2	1.48888	4.40782	2.91893	9.26×10-52	1.23×10-50
FGF18	0.791246	3.71243	2.92118	8.69×10-51	1.03×10-49
S100A11	7.24393	10.1685	2.92461	1.33×10-58	6.06×10-57
LGR5	0.82021	3.74586	2.92565	3.08×10-38	1.33×10-37
CCNE1	0.598014	3.52417	2.92616	1.34×10-61	4.94×10-59
CITED4	3.36099	6.28938	2.92839	2.75×10-45	1.9×10-44
MKI67	0.341592	3.27361	2.93202	4.7×10-61	8.73×10-59
JPT1	2.58657	5.51937	2.93281	4.44×10-62	4.94×10-59
LAMC2	1.65994	4.5981	2.93816	7.32×10-42	3.97×10-41
CXCL14	1.86911	4.81082	2.94171	1.31×10-27	3.39×10-27
IQANK1	0.454686	3.39739	2.94271	1.7×10-56	4.67×10-55
CDT1	0.533036	3.47697	2.94393	1.85×10-60	1.91×10-58
BIK	0.612312	3.56115	2.94884	1.69×10-50	1.91×10-49
TMC4	2.24899	5.19989	2.95091	6.34×10-41	3.21×10-40
IRF6	1.33072	4.28301	2.95229	8.83×10-45	5.88×10-44
RIPK4	0.660079	3.61911	2.95904	4.24×10-52	5.83×10-51
KPNA2	2.65681	5.61984	2.96303	9.15×10-61	1.18×10-58
EZR	4.2709	7.23708	2.96619	9.01×10-51	1.06×10-49
AL355309.1	0.623548	3.59376	2.97021	2.04×10-36	8.02×10-36
BMPR1B-DT	0.661433	3.64339	2.98196	4.93×10-37	2×10-36
FXYD3	1.2978	4.28013	2.98233	5.06×10-42	2.77×10-41
PRR36	0.681703	3.66469	2.98298	2.81×10-57	9.3×10-56
IGHA2	1.79025	4.7816	2.99135	4.74×10-29	1.31×10-28
TMSB10	8.8941	11.9016	3.00747	1.47×10-55	3.33×10-54
MMP9	0.65692	3.67209	3.01517	3.32×10-54	6.1×10-53
HGD	0.683558	3.70672	3.02316	1.11×10-45	7.9×10-45
KIAA1324	1.33682	4.36133	3.0245	5.24×10-27	1.32×10-26
KIF20A	0.391426	3.42023	3.0288	4.83×10-60	3.69×10-58
CEP55	0.320689	3.35078	3.03009	2.99×10-61	6.79×10-59
H2AFX	3.16484	6.1994	3.03456	8.44×10-59	4.05×10-57
LAMB3	0.938862	3.97875	3.03989	3.7×10-43	2.18×10-42
IFI6	5.12921	8.17606	3.04685	3.57×10-42	1.97×10-41
CCNO	0.7867	3.83478	3.04808	4.34×10-50	4.72×10-49
PAFAH1B3	3.01871	6.06821	3.0495	9.56×10-61	1.2×10-58
KRT19	4.74691	7.80662	3.05971	2.19×10-42	1.23×10-41
HMGB3	1.80044	4.86774	3.0673	1.41×10-60	1.61×10-58
DHCR24	2.70211	5.76949	3.06737	1.99×10-43	1.19×10-42
EYA2	2.31894	5.41178	3.09284	8.7×10-34	2.98×10-33
CTSV	0.4066	3.50004	3.09344	6.37×10-59	3.18×10-57
C1orf210	0.614488	3.70969	3.0952	5.67×10-57	1.77×10-55
IL4I1	0.942387	4.05393	3.11154	2.72×10-48	2.46×10-47
SOX17	3.44105	6.55498	3.11393	4.86×10-41	2.48×10-40
RRM2	0.420444	3.53494	3.1145	6.93×10-61	9.81×10-59
CDCA8	0.616381	3.73419	3.11781	1.58×10-61	5.14×10-59
KRTCAP3	1.89163	5.01344	3.12182	2.59×10-47	2.13×10-46
HOXB9	0.533756	3.67508	3.14133	3.01×10-46	2.24×10-45
GRHL2	0.645922	3.80123	3.15531	7.61×10-57	2.3×10-55
KRT23	0.769887	3.92546	3.15557	3.94×10-46	2.9×10-45
BSPRY	0.671045	3.82846	3.15742	6.26×10-58	2.4×10-56
CENPM	0.735948	3.89546	3.15952	1.32×10-58	6.01×10-57
HOXB8	1.18183	4.34609	3.16426	9.24×10-37	3.69×10-36
MSX1	3.40659	6.58631	3.17973	3.86×10-26	9.42×10-26
SOX9	1.12252	4.31184	3.18932	2.18×10-39	1.01×10-38
ALDH3B2	0.536996	3.72902	3.19202	8.93×10-52	1.19×10-50
NUP210	1.001	4.19538	3.19437	6.66×10-62	4.94×10-59
CCNB2	0.65841	3.85607	3.19766	9.9×10-62	4.94×10-59
NUSAP1	0.917846	4.11965	3.2018	5.14×10-60	3.84×10-58
PDZK1IP1	1.14017	4.34306	3.20289	3.08×10-37	1.26×10-36
SAPCD2	0.36821	3.595	3.22679	1.37×10-60	1.57×10-58
TMPRSS4	0.365454	3.6018	3.23634	3.25×10-57	1.05×10-55
NECTIN4	0.449534	3.70154	3.25201	8.3×10-59	3.99×10-57
KRT17	1.08807	4.34482	3.25675	5.64×10-44	3.51×10-43
GDF15	1.78062	5.03931	3.2587	8.68×10-49	8.24×10-48
ESPN	0.68215	3.94448	3.26233	7.92×10-52	1.06×10-50
MARCKSL1	5.30248	8.57008	3.2676	6.16×10-52	8.3×10-51
CRB3	0.887185	4.16137	3.27419	1.79×10-57	6.19×10-56
SCNN1A	2.04092	5.32545	3.28453	5.01×10-45	3.4×10-44
PRR15	1.42744	4.72398	3.29654	2.51×10-45	1.74×10-44
UBE2T	1.34455	4.6491	3.30455	9.15×10-61	1.18×10-58
LSR	3.29468	6.61163	3.31696	3.16×10-57	1.03×10-55
AGR2	1.224	4.55658	3.33258	1.06×10-36	4.22×10-36
SCGB1D2	1.69652	5.0294	3.33288	1.65×10-28	4.42×10-28
MIR200CHG	0.775137	4.10813	3.33299	1.47×10-48	1.36×10-47
LMNB1	1.37275	4.70659	3.33383	1.56×10-60	1.73×10-58
MYH14	1.08381	4.42046	3.33665	7×10-48	6.08×10-47
SBK1	0.60306	3.94496	3.3419	1.99×10-59	1.19×10-57
SCD	2.27179	5.61371	3.34193	9.32×10-55	1.86×10-53
PTTG1	1.11748	4.46349	3.34601	5.25×10-61	8.86×10-59
DEFB1	1.24368	4.60917	3.36549	3.67×10-35	1.35×10-34
AL022718.1	0.8695	4.235	3.3655	2.59×10-31	7.86×10-31
KIFC1	0.732281	4.1368	3.40452	2.68×10-61	6.73×10-59
AURKB	0.517232	3.92716	3.40993	7.06×10-61	9.83×10-59
C4orf48	1.49519	4.90575	3.41056	5.74×10-54	1.02×10-52
AC010503.4	1.13699	4.55133	3.41434	2.98×10-44	1.9×10-43
IGHA1	3.94987	7.36885	3.41897	1.05×10-27	2.73×10-27
SLC7A5	1.30264	4.73662	3.43398	7.94×10-56	1.89×10-54
CXCL17	0.655905	4.11096	3.45505	5.55×10-42	3.03×10-41
TJP3	0.971998	4.42939	3.4574	2.73×10-51	3.41×10-50
KDF1	0.747481	4.21008	3.4626	1.15×10-53	1.97×10-52
CCNB1	1.59743	5.06108	3.46365	1.57×10-61	5.14×10-59
MISP	0.645671	4.13095	3.48527	1.43×10-50	1.64×10-49
SMIM22	1.21192	4.69955	3.48762	2.29×10-43	1.36×10-42
TMEM125	0.870111	4.36079	3.49068	1.79×10-51	2.3×10-50
DSP	1.45688	4.95215	3.49527	2.41×10-56	6.3×10-55
ISG15	3.7855	7.29428	3.50878	6.32×10-54	1.12×10-52
SNORD104	1.18247	4.72003	3.53756	1.74×10-42	9.79×10-42
VAMP8	3.43251	6.9728	3.54028	4.01×10-52	5.53×10-51
BIRC5	0.43402	3.99775	3.56373	1.68×10-61	5.19×10-59
TOP2A	0.676826	4.27182	3.59499	3.64×10-60	2.96×10-58
ESRP1	0.83962	4.45243	3.61281	4.42×10-55	9.27×10-54
SPINT2	3.4666	7.0809	3.6143	1.17×10-54	2.31×10-53
PKP3	1.04366	4.66403	3.62037	5.06×10-54	9.05×10-53
PODXL2	1.70925	5.33414	3.62489	5.9×10-57	1.82×10-55
PRR15L	0.771627	4.41529	3.64367	4.85×10-50	5.26×10-49
CBLC	0.716498	4.37141	3.65491	1.49×10-56	4.18×10-55
ZWINT	0.938819	4.61328	3.67446	4.72×10-61	8.73×10-59
PSAT1	1.47476	5.18604	3.71128	9.56×10-50	1.01×10-48
FOLR1	1.17558	4.91088	3.7353	5.96×10-40	2.86×10-39
TSPAN1	2.01783	5.77768	3.75986	4.95×10-41	2.52×10-40
PAX8	1.89688	5.65967	3.76279	3.02×10-44	1.92×10-43
LARGE2	1.09323	4.87277	3.77954	3.48×10-57	1.12×10-55
FAM83H	0.859902	4.68109	3.82119	9.14×10-56	2.16×10-54
HMGA1	3.15703	6.9804	3.82336	7.82×10-53	1.18×10-51
SPDEF	1.22799	5.0641	3.83611	5.46×10-39	2.47×10-38
VTCN1	0.871642	4.7082	3.83655	1.82×10-47	1.52×10-46
PI3	0.551706	4.39256	3.84085	1.26×10-49	1.3×10-48
ELF3	1.4858	5.34525	3.85944	9.23×10-52	1.22×10-50
ASF1B	0.601167	4.4736	3.87243	1.09×10-61	4.94×10-59
SMPDL3B	0.714843	4.60791	3.89307	7.46×10-60	5.3×10-58
TFF3	2.2221	6.14466	3.92256	2.44×10-27	6.24×10-27
TPX2	0.567167	4.54339	3.97622	2.77×10-61	6.73×10-59
CKS2	2.33338	6.37471	4.04133	1.64×10-60	1.79×10-58
MT-TC	1.66422	5.71007	4.04585	6.36×10-32	1.98×10-31
MAL2	1.18035	5.2765	4.09616	2.87×10-48	2.59×10-47
FOXJ1	1.21621	5.33375	4.11754	9.21×10-43	5.28×10-42
UCP2	2.77939	6.91126	4.13188	2.76×10-50	3.07×10-49
DLX5	1.47041	5.6067	4.13629	1.84×10-41	9.7×10-41
SLC34A2	1.46938	5.61502	4.14563	1.55×10-40	7.68×10-40
KRT8	3.78236	8.01274	4.23038	9.53×10-59	4.52×10-57
KRT7	1.51973	5.8023	4.28257	4.99×10-45	3.39×10-44
SPP1	2.03199	6.36153	4.32954	4.31×10-52	5.92×10-51
CDH1	1.41179	5.74615	4.33436	6.48×10-51	7.77×10-50
TK1	1.24749	5.62926	4.38177	1.34×10-61	4.94×10-59
CLDN7	1.6033	5.99925	4.39595	2.17×10-54	4.1×10-53
PIGR	1.48755	5.89415	4.4066	3.79×10-35	1.39×10-34
SDC1	1.14657	5.60334	4.45677	3.45×10-61	7.35×10-59
AQP5	0.845209	5.34077	4.49556	7.85×10-50	8.32×10-49
LAD1	1.04632	5.55033	4.50401	4.55×10-58	1.79×10-56
KRT18	3.50806	8.05759	4.54953	3.05×10-57	1×10-55
MT-TY	1.69984	6.25792	4.55808	6.21×10-34	2.15×10-33
CDC20	0.748066	5.37585	4.62778	4.86×10-62	4.94×10-59
MYBL2	0.392087	5.06521	4.67312	3.81×10-62	4.94×10-59
AP1M2	1.46338	6.14034	4.67696	1.84×10-54	3.52×10-53
RAB25	1.50142	6.21599	4.71458	7.63×10-54	1.34×10-52
LCN2	1.57545	6.29829	4.72285	1.55×10-43	9.37×10-43
CLDN4	1.64665	6.39634	4.74968	2.36×10-52	3.37×10-51
SPINT1	1.7002	6.4678	4.7676	2.99×10-57	9.82×10-56
TACSTD2	2.14867	6.97256	4.82389	1.95×10-52	2.81×10-51
UBE2C	0.917456	5.76671	4.84925	6.26×10-61	9.47×10-59
SERINC2	1.84961	6.71388	4.86426	8.73×10-54	1.52×10-52
ST14	1.54569	6.58401	5.03832	2.59×10-54	4.84×10-53
CD24	3.20125	8.26514	5.06388	1.79×10-53	2.98×10-52
PRSS8	1.26983	6.45707	5.18724	7.9×10-60	5.54×10-58
PRAME	0.790296	5.98347	5.19318	3.64×10-61	7.48×10-59
SCGB2A1	2.49915	7.90512	5.40598	4.25×10-36	1.63×10-35
SFN	1.06733	6.59813	5.53079	1.29×10-59	8.41×10-58
WFDC2	4.19628	10.0794	5.88312	1.89×10-48	1.74×10-47
EPCAM	1.89246	7.82355	5.93109	1.27×10-58	5.81×10-57
CLDN3	1.93563	8.00143	6.0658	2.04×10-51	2.59×10-50
MT-TP	3.06399	9.13884	6.07485	3.24×10-21	6.58×10-21
SLPI	3.26332	9.56555	6.30223	3.65×10-46	2.7×10-45
